1 *Neural mechanisms to exploit positional geometry for collision avoidance*

## 2 **Authors**

3 Ryosuke Tanaka<sup>1</sup>, Damon A. Clark<sup>1,2,3,4,#</sup>

## 4 **Affiliations**

5 1 - Interdepartmental Neuroscience Program, Yale University, New Haven, CT 06511, USA

6 2 - Department of Molecular Cellular and Developmental Biology, Yale University, New Haven,  
7 CT 06511, USA

8 3 - Department of Physics, Yale University, New Haven, CT 06511, USA

9 4 - Department of Neuroscience, Yale University, New Haven, CT 06511, USA

10 # Lead Contact: [damon.clark@yale.edu](mailto:damon.clark@yale.edu)

## 11 **Summary**

12 Visual motion provides rich geometrical cues about the three-dimensional configuration the world.  
13 However, how brains decode the spatial information carried by motion signals remains poorly  
14 understood. Here, we study a collision avoidance behavior in *Drosophila* as a simple model of  
15 motion-based spatial vision. With simulations and psychophysics, we demonstrate that walking  
16 *Drosophila* exhibit a pattern of slowing to avoid collisions by exploiting the geometry of positional  
17 changes of objects on near-collision courses. This behavior requires the visual neuron LPLC1,  
18 whose tuning mirrors the behavior and whose activity drives slowing. LPLC1 pools inputs from  
19 object- and motion-detectors, and spatially biased inhibition tunes it to the geometry of collisions.  
20 Connectomic analyses identified circuitry downstream of LPLC1 that faithfully inherits its  
21 response properties. Overall, our results reveal how a small neural circuit solves a specific spatial  
22 vision task by combining distinct visual features to exploit universal geometrical constraints of the  
23 visual world.

24

## 25 Introduction

26 The problem of spatial vision addresses how we can sense three-dimensional configurations of our  
27 surroundings from the “flat” images on our retinas. This problem has long been a central issue in  
28 vision science (Berkeley, 1709; von Helmholtz, 1924). In solving this problem, visual motion is a  
29 particularly useful source of spatial information, since the pattern of retinal motion caused by  
30 relative movements between an observer and its environment follows lawful geometry (Gibson,  
31 1966). Indeed, neuroanatomical and physiological studies in primates have established that  
32 motion-sensitive cortical visual areas, like area MT, comprise a part of the so-called “where”  
33 pathway (Goodale and Milner, 1992; Mishkin et al., 1983) and contribute to the perception of  
34 three-dimensional structures based on motion cues (Bradley et al., 1998). However, circuit-level  
35 understanding of how spatial information carried by visual motion is decoded to guide specific  
36 behaviors remains largely missing. A useful model system to explore the mechanism of motion-  
37 based spatial vision is the fruit fly *Drosophila*, where powerful genetic (Guo et al., 2019) and  
38 connectomic (Scheffer et al., 2020) tools allow one to dissect neural circuit mechanisms in detail.  
39 In addition, recent years have seen rapid progress in understanding of the motion detection  
40 circuitry in the *Drosophila* visual system (Borst et al., 2020; Yang and Clandinin, 2018), which  
41 can now guide attempts to pinpoint neural mechanisms of spatial vision in flies.

42 For many animals, one routine task that requires spatial vision is avoiding collisions with other  
43 animals. Collision with predators poses an obvious survival threat to animals, and unwanted  
44 collisions with conspecifics compromise navigation, even when there is no risk of predation. As  
45 objects move relative to the observer, geometry dictates the size and position of their retinal images  
46 over time. Objects approaching the observer expand in apparent size, or ‘loom’, providing a useful  
47 and well-studied collision cue (Branco and Redgrave, 2020; Peek and Card, 2016). Importantly,  
48 beyond the change in size, change in an object’s position can also provide useful cues about  
49 impending collisions: provided an observer and an approaching object both maintain constant  
50 velocities, the retinal position of the object stays constant only if it is on a collision course, a  
51 situation analogous to “constant bearing, decreasing range” in maritime navigation (Murtaugh and  
52 Criel, 1966). Similarly, approaching objects will move back-to-front across the retina if they will  
53 cross in front of the observer, or will move front-to-back across the retina if they will cross behind  
54 the observer (**Fig. 1A**). Path crossings in front pose a collision risk to the observer, especially when  
55 the object crossing a path is capable of stopping suddenly. Thus, back-to-front motion can function  
56 as a heuristic geometrical cue for imminent future collisions. Indeed, a previous study  
57 demonstrated that walking flies halt upon observing visual objects moving back-to-front (Zabala  
58 et al., 2012), a strategy that could avoid collisions with conspecifics (Chalupka et al., 2016).  
59 However, the circuits governing such collision avoidance based on directional motion remain  
60 unknown.

61 Here, we investigate how *Drosophila* uses positional changes to avoid collision at both behavioral  
62 and circuit levels. First, by combining simulations and a high-throughput psychophysics, we  
63 demonstrate that the flies exhibit a pattern of slowing that avoids collisions by exploiting the

64 positional geometry associated with them. Second, using synaptic silencing and optogenetics, we  
65 show that a visual projection neuron called LPLC1 is necessary for this collision avoidance  
66 behavior, and activating LPLC1 elicits slowing. LPLC1's response properties, as measured with  
67 two-photon calcium imaging, mirror the tuning of the collision avoidance behavior, including a  
68 spatial bias in direction selectivity concordant with the positional geometry of collisions. Third,  
69 we show that LPLC1 combines excitatory inputs from elementary motion and object detectors,  
70 and achieves selectivity for objects on near-collision courses in part through spatially biased  
71 glutamatergic inhibition. Last, we identify a central brain pathway for this collision avoidance and  
72 show that it faithfully inherits response properties of LPLC1. Overall, the results reveal how  
73 signals from motion and object detectors can be combined to implement a solution for a spatial  
74 vision task that exploits a universal geometrical constraint of the visual world.

## 75 Results

### 76 *Back-to-front motion is a useful terrestrial collision cue*

77 As objects move relative to an observer, their apparent size and position change systematically as  
78 dictated by geometry. There are at least two reasons to think that back-to-front motion in particular  
79 can be a useful heuristic cue to detect and avoid collisions with objects. First, optic flow caused  
80 by forward translation always moves front-to-back. Therefore, any back-to-front motion observed  
81 during forward locomotion can be attributed to non-stationary objects in the surroundings (Zabala  
82 et al., 2012). Second, an approaching object will appear moving in the back-to-front direction if it  
83 is about to cross in front of the observer, and will appear to move front-to-back if it will cross  
84 behind the observer (**Fig. 1A**). If the approaching object is an animal, it could stop while crossing  
85 in front of the observer and thus poses a collision risk. To gain better intuition about how and when  
86 back-to-front motion is useful to predict frontal path crossings, we simulated an observer moving  
87 forward in the presence of objects with random relative positions and constant random velocities  
88 (**Fig. 1B**). We quantified how each object contributed to the ‘immediate collision risk’, defined as  
89 the time-discounted, inverted intercept between the observer and object trajectories (see *Methods*  
90 for details of the simulation).

91 When we plotted the collision risk against retinal angular position and velocity of the object (**Fig.**  
92 **1C**), there were two pairs of clusters with high collision risk: one around zero velocity and the  
93 other around large velocities in the back-to-front direction. The zero-velocity clusters correspond  
94 to the “constant bearing, decreasing range” situation (**Fig. 1D**), where the object is directly  
95 intercepting the observer. A second cluster with higher back-to-front velocities represents nearby  
96 objects about to cross in front of the observer at acute angles (**Fig. 1D**). In these higher velocity  
97 clusters, the collision risk was higher for lateral rather than for directly frontal objects (**Fig. 1C**).  
98 This is because objects moving laterally right in front of the observer tend to cross the observer’s  
99 path long before the observer reaches that location. These results suggest that back-to-front motion  
100 of objects predicts imminent near-collisions, especially in the frontolateral visual field.

101

### 102 *Drosophila shows direction selective slowing in response to stimuli mimicking conspecifics*

103 With the above geometrical results in mind, we designed experiments to characterize how flies  
104 respond to visual objects moving in the back-to-front direction in our high throughput  
105 psychophysics assay. In our assay, tethered flies were placed above of air-suspended balls, and  
106 their walking responses were recorded as the rotation of the balls (Creamer et al., 2019; Salazar-  
107 Gatzimas et al., 2016). Visual stimuli were presented on panoramic screens surrounding the flies  
108 (**Fig. 1E**). As visual stimuli, we first simulated a black object that linearly approached the fly from  
109 the side with a constant velocity, independent of the fly’s behavior (hereafter ‘approach stimulus’;  
110 See *Methods* for details). The size (2 mm tall, 3 mm wide) and velocity (20 mm/s) of the object  
111 was approximately matched to the realistic size and walking velocity of *Drosophila* (Branson et

112 al., 2009; DeAngelis et al., 2019). The trajectories of the objects started either in front of or behind  
113 the fly in a symmetric manner, and only the objects starting from behind the fly are projected to  
114 cross in front of the observer fly. From the fly's perspective, the objects appearing behind move  
115 back-to-front, while those appearing in front move front-to-back, and both expand in size  
116 identically over time (**Fig. 1F**). Wildtype flies slowed slightly in response to the front-starting  
117 approach stimulus, but slowed substantially more and for a longer duration in response to the rear-  
118 starting approach stimuli (**Fig. 1G, H**).

119 Although this observation is consistent with the idea that flies freeze in response to back-to-front  
120 moving objects, as previously observed (Zabala et al., 2012), it is also possible that the looming in  
121 the frontal visual field, rather than back-to-front motion itself, triggered the observed slowing. To  
122 exclude this possibility, we simulated a rectangular object that moved parallel to the fly, again  
123 starting either from in front of or behind the fly (hereafter 'parallel stimulus') (**Fig. 1I**). Wildtype  
124 flies presented with the parallel stimuli again slowed significantly more in response to rear-starting  
125 conditions (**Fig. 1J, K**). Since the front- and rear-starting parallel stimuli are trajectory-matched  
126 and contain virtually no looming, this result strongly suggests that the observed slowing behavior  
127 is selective for the direction of object motion. An object moving parallel to the fly's trajectory  
128 constitutes a false-positive case from the collision avoidance perspective, since such a parallel  
129 trajectory would never cross the path of the observer, but flies have been reported to freeze in  
130 response to such stimuli (Zabala et al., 2012). In addition to slowing, both approach and parallel  
131 stimuli also elicited mild turning against the direction and position of object motion (**Fig. S1A, B**)  
132 (Maimon et al., 2008; Tanaka and Clark, 2020). Overall, these results suggest that flies initiate  
133 slowing in response to back-to-front motion, likely reflecting a collision avoidance behavior.

134

### 135 *The pattern of direction selective slowing mirrors the geometry of collision*

136 One of the reasons why back-to-front motion can be a useful collision cue is that it is directed  
137 counter to the optic flow from forward translation and thus can be unambiguously attributed to  
138 moving objects. This argument suggests that flies would exhibit the direction-selective collision  
139 avoidance behavior even in the presence of cluttered, moving backgrounds, as long as objects and  
140 backgrounds are moving against each other. To test this hypothesis, we presented wildtype flies  
141 with  $10^\circ \times 10^\circ$  black squares translating against half-contrast,  $5^\circ$  resolution random checkerboard  
142 patterns that rotated around the fly at several velocities (**Fig. 1L**). Rotational, rather than  
143 translational background was used, since translational optic flow presented in an open-loop manner  
144 by itself potently slows flies (Creamer et al., 2018), making it difficult to observe additional  
145 slowing induced by objects. Overall, rotating backgrounds, especially fast ones, suppressed the  
146 slowing caused by moving objects (**Fig. 1M, N**), in addition to causing mild slowing and strong  
147 turning (**Fig. S1C**). Interestingly, while slowing caused by a front-to-back object was suppressed  
148 equally by backgrounds moving either direction, flies slowed significantly more to an object  
149 moving in the back-to-front direction when it is on a background moving against rather than with

150 the object (**Fig. 1O**). This result indicates that flies use relative motion between object and  
151 background, in addition to the directionality of object motion itself, to initiate slowing.

152 Last, we asked if there is any spatial bias in the observed slowing behavior that could match the  
153 geometry of frontal path crossing (**Fig. 1C**). To do so, we presented a small square sweeping a  
154 short horizontal trajectory in either direction at different azimuthal locations (**Fig. 1P**). Objects in  
155 front elicited more slowing in wildtype flies regardless of direction, and slowing was selective for  
156 back-to-front direction at all azimuths (**Fig. 1Q**). However, the directional difference in slowing  
157 showed a U-shaped pattern, indicating that slowing in response to frontolateral objects were more  
158 selective for back-to-front direction (**Fig. 1R**). This result implies that the direction selectivity of  
159 the slowing behavior is strongest in the same azimuthal range where back-to-front motion most  
160 strongly predicts future collision (**Fig. 1C**).

161

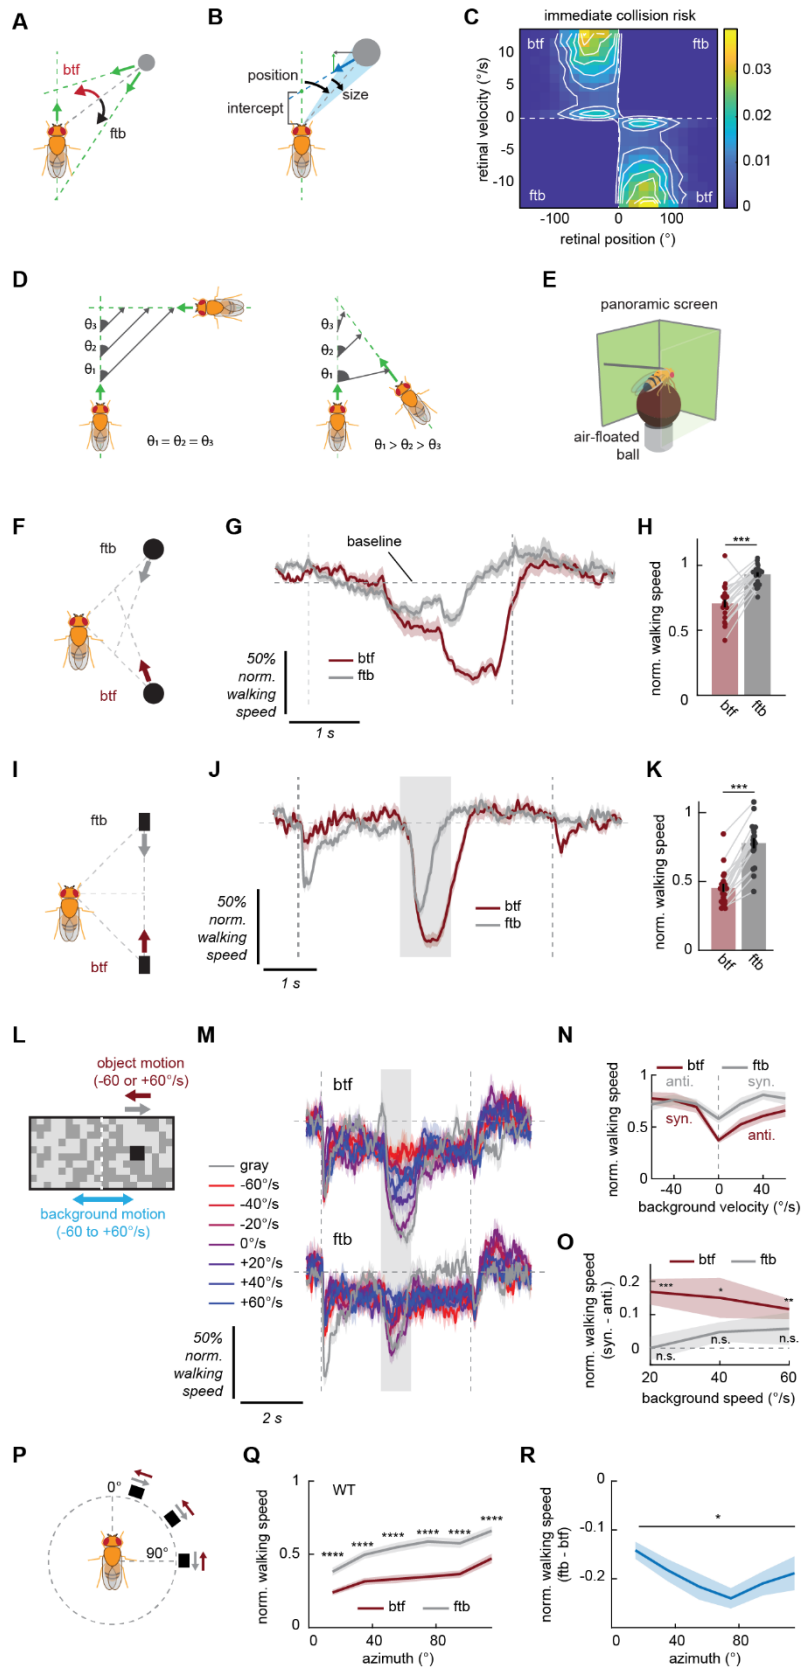

162

163 **Figure 1. Flies exhibit slowing that mirrors geometry of collisions.**

- 164 (A) Geometry of collisions. Objects crossing the path in front of an observer appear to move in the  
165 back-to-front (btf) direction across the retina, whereas ones crossing behind the observer will  
166 appear to move front-to-back (ftb).
- 167 (B) A schematic of the simulation. Linearly translating circular objects were placed at random  
168 around an observer that moved forward at a constant velocity. The collision risk posed by the  
169 object was calculated based on their future path-crossing intercept.
- 170 (C) Immediate collision risk, defined as time-discounted inverse of positive future intercept (see  
171 *Methods* for details), as a function of angular position and velocity. Odd and even quadrants  
172 respectively correspond to front-to-back and back-to-front motion.
- 173 (D) (*left*) When an object is on an exact collision course with the observer, the relative bearing ( $\theta$ )  
174 of the observer remains constant. (*right*) An object that crosses the path in front of the observer at  
175 an acute angle decrease its bearing as they approach, causing back-to-front motion.
- 176 (E) Schematic of the setup for the behavioral experiments in which flies walked on a spherical  
177 treadmill while they were presented with panoramic visual stimuli.
- 178 (F) In the approach stimuli, simulated black circular objects approached the fly obliquely either  
179 from the front (ftb) or from the back (btf).
- 180 (G, H) Wildtype fly normalized walking response to the approach stimuli in either direction, (G)  
181 as a function of time or (H) time-averaged. Forward walking speed was normalized by the baseline  
182 speed during the preceding interstimulus period, which is indicated by horizontal dotted line. The  
183 vertical dotted lines mark the beginning and the end of the stimulus. Each dot in (H) represents a  
184 fly, and data from the same flies are connected with gray lines.
- 185 (I) In the parallel stimuli, simulated black rectangular objects appeared by the fly and remained  
186 stationary for 2 seconds, moved in a trajectory parallel to the fly in either direction for one second,  
187 stopped for another 2 seconds, and then disappeared.
- 188 (J, K) Same as (G, H), but for the parallel stimuli. Time-averaged responses were calculated within  
189 the shaded region in (J). The vertical dotted lines and the shaded regions respectively represent on-  
190 and offset of the object and the period during which the object was moving.
- 191 (L) Schematic of the stimuli used to test the interaction between the collision avoidance behavior  
192 and background motion.
- 193 (M) Wildtype fly normalized walking response to squares moving in either direction (*top*: back-  
194 to-front, *bottom*: front-to-back), paired with rotating backgrounds. The velocity of the background  
195 is color-coded. The gray shaded region indicates when the object was moving.
- 196 (N) Time-averaged normalized walking responses of wildtype flies to squares moving in either  
197 direction, as functions of background velocities. Averaging was within the shaded region in (M).  
198 Positive velocity is in the same direction as back-to-front (btf).



199 (O) Time-averaged normalized walking speed in response to squares when the background was  
200 moving with the square minus when the background was moving against the square, for each  
201 background speed.

202 (P) To probe retinotopic bias in the direction selective slowing, black rectangular objects sweeping  
203 short horizontal trajectories in either direction were presented at various azimuthal locations.

204 (Q, R) Time-averaged normalized walking response of wildtype flies to the azimuth sweep stimuli  
205 as functions of azimuth, either (Q) by the motion directions or (R) the difference between the two.  
206 The averaging window was 1 second long from the onset of the stimuli.

207 Error bars and shades around mean traces all indicate standard error of the mean. (G, H) N = 21  
208 flies. (J, K) N = 19 flies. (M-O) N = 19 flies. (Q, R) N = 39 flies. n. s.: not significant ( $p > .05$ ); \*:  
209  $p < .05$ ; \*\*:  $p < .01$ ; \*\*\*:  $p < .001$ ; \*\*\*\*:  $p < .0001$  in Wilcoxon signed-rank test or Friedman test  
210 (R only).

211

212 *LPLC1 activity is necessary and sufficient for the slowing behavior*

213 We next worked to identify neural substrates for this collision avoidance behavior. Since the  
214 slowing is selective for the direction of object motion, we hypothesized that synaptic outputs of  
215 T4 and T5 neurons, the first direction selective cells in the fly visual system (Maisak et al., 2013),  
216 would be necessary for the behavior. When we silenced the synaptic output of T4 and T5 by  
217 introducing *shibire<sup>ts</sup>* (Kitamoto, 2001) to these cells, slowing in response to back-to-front parallel  
218 stimuli was significantly reduced compared to the genetic controls (**Fig. 2A, B**), while slowing in  
219 response to front-to-back stimuli was significantly increased, almost abolishing the direction  
220 selectivity in the behavior. Similarly, silencing T4 and T5 significantly reduced fly slowing in  
221 response to back-to-front approach stimuli (**Fig. S1D, E**). These results show that T4/T5 are  
222 required for the direction selective collision avoidance behavior.

223 Next, we aimed to identify neurons downstream of T4/T5 that selectively respond to objects  
224 moving back-to-front to trigger the slowing behavior. Lobula plate (LP), the neuropil where T4/T5  
225 axon terminals reside, is innervated by several types of columnar visual projection neurons (VPNs)  
226 (Eliason, 2017; Fischbach and Dittrich, 1989; Isaacson, 2018; Mu et al., 2012; Panser et al., 2016;  
227 Wu et al., 2016). Columnar VPNs have been shown to detect specific local visual features that  
228 trigger a variety of behaviors (Ache et al., 2019; Eliason, 2017; Isaacson, 2018; Klapoetke et al.,  
229 2017; von Reyn et al., 2017; Ribeiro et al., 2018; Tanaka and Clark, 2020; Wu et al., 2016), so  
230 they make good candidates for the putative back-to-front moving object detector. Among the  
231 known LP-innervating columnar VPN types, LPLC2 has been shown to detect visual loom and  
232 drive escape responses (Ache et al., 2019; Klapoetke et al., 2017) and LPC1 and LLPC1 to detect  
233 translational optic flow and drive slowing (Eliason, 2017; Isaacson, 2018). Among remaining LP-  
234 innervating VPNs with no known function, a neuron type called lobula plate-lobula columnar cell  
235 type 1 (LPLC1) is particularly well positioned to detect objects moving back-to-front, because it  
236 innervates layer 2 of LP, which houses T4/T5 terminals tuned to back-to-front motion, but not the  
237 front-to-back-selective layer 1 (Maisak et al., 2013; Wu et al., 2016). To test whether LPLC1 is  
238 necessary for the slowing, we silenced synaptic outputs of LPLC1 by expressing *shibire<sup>ts</sup>*, and  
239 examined its effect on the behavior. We found that flies with LPLC1 silenced slowed significantly  
240 less in response to the back-to-front parallel (**Fig. 2C, D**) as well as approach stimuli (**Fig. S1F,**  
241 **G**), indicating that LPLC1 is necessary for the wild-type slowing phenotype. We also confirmed  
242 that silencing LPLC1 does not affect several visuomotor behaviors known to be dependent on  
243 T4/T5 (**Fig. S1H-J**).

244 We also tested how silencing either T4/T5 or LPLC1 affects the spatial bias in the slowing behavior  
245 (**Fig. 1P-R**). Silencing T4 and T5 increased slowing in response to front-to-back objects in front,  
246 and reduced slowing in response to front-to-back objects on the side (**Fig. 2E**). This reduced the  
247 direction selectivity of slowing across the almost all azimuth tested, abolishing the U-shaped  
248 pattern of directional difference in slowing visible in control genotypes (**Fig. 2F**). Similarly,  
249 silencing of LPLC1 reduced slowing in response to back-to-front objects across broad azimuths  
250 (**Fig. 2E**). However, reduction in directional differences of slowing was only significant from the

251 both of the two control genotypes at lateral azimuths (**Fig. 2F**). This result suggests that direction  
252 selectivity of LPLC1 neurons is spatially biased and most pronounced in the frontolateral  
253 azimuthal range where back-to-front motion most strongly predicts near collision (**Fig. 1C**).

254 To further confirm the involvement of LPLC1 in the slowing behavior, we optogenetically  
255 activated LPLC1 neurons in blind (*norpA<sup>-</sup>*) flies, and tested whether activity in LPLC1 can trigger  
256 slowing. Blind flies expressing a red-shifted channelrhodopsin Chrimson (Klapoetke et al., 2014)  
257 in LPLC1 were tethered on air suspended balls, and pulses of green light with various durations  
258 were shone onto the flies from the DLP projectors (Creamer et al., 2019; Tanaka and Clark, 2020)  
259 (**Fig. 2G**). We compared the walking velocity changes in response to green lights between flies  
260 fed with food with or without all-trans retinal (ATR) (de Vries and Clandinin, 2013), a cofactor  
261 necessary for channelrhodopsin function. While flies fed with food without ATR did not show any  
262 response to green lights, flies fed with ATR exhibited duration-dependent slowing in response to  
263 green light (**Fig. 2H, I**), showing that the activity of LPLC1 alone is sufficient to make flies slow.

264

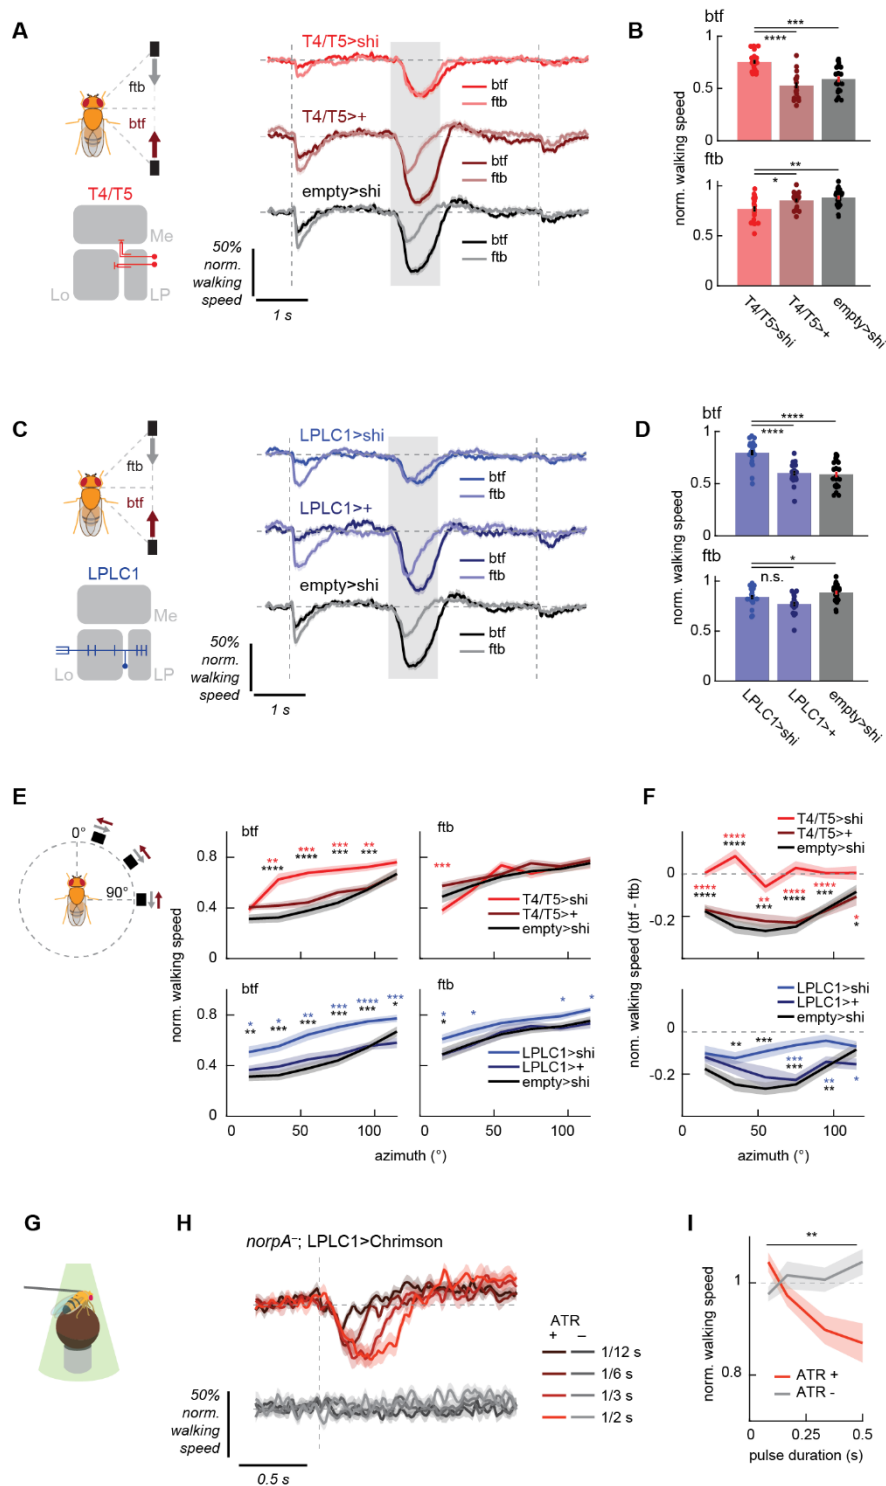

265

266 **Figure 2. LPLC1 is necessary for collision avoidance and sufficient to cause slowing.**

267 (A, B) Normalized walking responses of T4/T5 silenced flies and their controls in response to the  
 268 parallel stimuli, (A) over time or (B) averaged over time, as in **Fig. 1J, K**.

269 (C, D) Same as (A, B), but for LPLC1.

270 (E) Time-averaged walking responses of (*top*) T4/T5 or (*bottom*) LPLC1 silenced flies with their  
271 respective controls to the azimuth sweep stimuli by directions, as in **Fig. 1Q**.

272 (F) The directional differences of the walking responses of the same flies as in (E) to the azimuth  
273 sweep stimuli, as in **Fig. 1R**.

274 (G) A schematic of the optogenetics setup.

275 (H, I) Walking response of LPLC1>Chrimson flies with or without ATR feeding to pulses of green  
276 light, either (H) over time or (I) time-averaged. The averaging window was 1 second long.

277 Error bars and shades around mean traces all indicate standard error of the mean. (A, B) N = 19  
278 (T4/T5>shi), 17 (T4/T5>+), 22 (empty>shi) flies. (C, D) N = 20 (LPLC1 >shi), 17 (LPLC1>+),  
279 22 (empty>shi) flies. (E, F) N = 18 (T4/T5>shi), 20 (T4/T5>+), 19 (LPLC1>shi), 16 (LPLC1>+),  
280 19 (empty>shi) flies. (H, I) N = 13 (ATR+), 12 (ATR-) flies. n. s.: not significant ( $p > .05$ ); \*:  $p$   
281  $< .05$ ; \*\*:  $p < .01$ ; \*\*\*:  $p < .001$ ; \*\*\*\*:  $p < .0001$  in Wilcoxon rank sum test (B, D-F) and 2-way  
282 analysis of variance (ANOVA) (I; the main effect of ATR conditions).

283

284

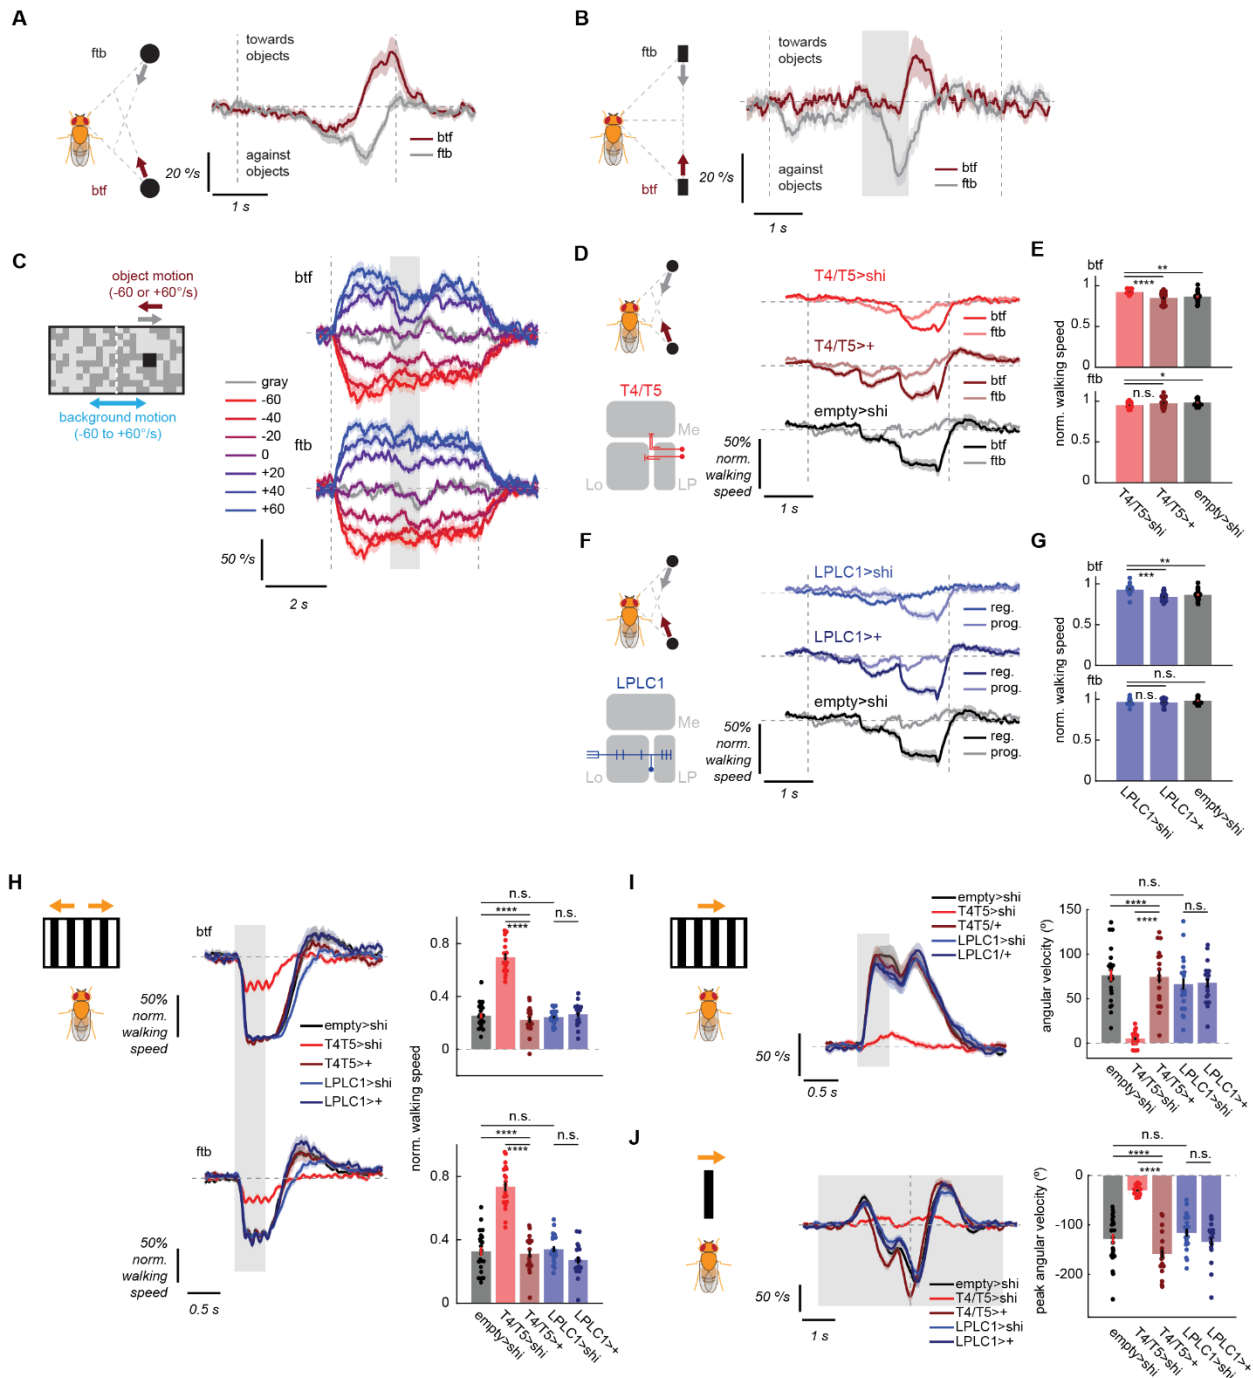

285

286 **Supplementary Figure 1. Additional behavioral characterization. (Related to Figs. 1, 2)**

287 (A-C) Turning responses of wildtype flies to the (A) approach stimuli, (B) parallel stimuli, and (C)  
 288 squares paired with rotating backgrounds, by stimulus directions and background velocities.

289 (D-G) Normalized walking responses of flies to the approach stimuli with (D, E) T4/T5 or (F, G)  
 290 LPLC1 silenced and their respective genetic controls, either (D, F) over time or (E, G) time-  
 291 averaged, as in Fig. 1G, H.

292 (H-J) Examples of T4/T5-dependent behaviors where LPLC1 is dispensable. (H) Slowing  
293 responses of flies with T4/T5 or LPLC1 silencing and their controls to translational gratings either  
294 back-to-front or front-to-back, either (*left*) over time or (*right*) time-averaged. (I) Optomotor  
295 turning responses of flies with T4/T5 or LPLC1 silencing and their controls to drifting gratings,  
296 either (*left*) over time or (*right*) time-averaged. (J) Aversive turning responses of flies with T4/T5  
297 or LPLC1 silencing and their controls to fast translating vertical bars, either (*left*) over time or  
298 (*right*) peak turning amplitudes.

299 Error bars and shades around mean traces all indicate standard error of the mean. (A) N = 21 flies.  
300 (B) N = 19 flies. (C) N = 19 flies. (D, E) N = 20 (T4/T5>shi), 23 (T4T5>+), 21 (empty>shi) flies.  
301 (C, D) N = 16 (LPLC1>shi), 21 (LPLC1>+), 21 (empty>shi) flies. (H-J) N = 19 (T4/T5>shi), 17  
302 (T4/T5>+), 20 (LPLC1>shi), 17 (LPLC1>+), 22 (empty>shi) flies. n. s.: not significant ( $p > .05$ );  
303 \*:  $p < .05$ ; \*\*:  $p < .01$ ; \*\*\*:  $p < .001$ ; \*\*\*\*:  $p < .0001$  in Wilcoxon rank sum test.

304 *Visual response properties of LPLC1 neurons mirror the tuning of the collision avoidance*  
305 *behavior*

306 To better understand how LPLC1 contributes to this collision avoidance behavior, we next used  
307 two-photon calcium imaging to directly explore the visual tuning of LPLC1 neurons (**Fig. 3A**).  
308 First, to broadly characterize their response properties, we imaged the axon terminals of LPLC1  
309 neurons expressing GCaMP6f (Chen et al., 2013) while presenting a variety of visual stimuli. The  
310 axon terminals of columnar VPNs including LPLC1 form structures called optic glomeruli, where  
311 retinotopy is mostly discarded (Otsuna and Ito, 2006; Panzer et al., 2016; Wu et al., 2016 -- but  
312 see Morimoto et al., 2020). Thus, glomerular calcium activity can be interpreted as the spatially  
313 averaged population activity of LPLC1 neurons. We used a battery of stimuli consisting of full-  
314 field drifting square wave gratings, full-field flashes, moving bars and small squares, and  
315 expanding disks. LPLC1 did not respond to wide field stimuli, while it did respond to moving bars  
316 and small squares (**Fig. 3B**), consistent with previous measurements (Städle et al., 2020). As  
317 expected from the behavioral results, LPLC1's responses to bars and squares were significantly  
318 selective for the back-to-front direction (**Fig. 3C**). LPLC1 vigorously responded to dark expanding  
319 disks, similar to several other types of columnar VPNs (Ache et al., 2019; Klapoetke et al., 2017;  
320 Morimoto et al., 2020; von Reyn et al., 2017; Wu et al., 2016).

321 To characterize the receptive field structure of LPLC1 neurons in more detail, we next recorded  
322 activity of individual LPLC1 neurons from their main dendritic stalks in lobula (**Fig. S2A**). For  
323 each cell, we first estimated their receptive field (RF) with translating black squares (Tanaka and  
324 Clark, 2020) (**Fig. S2B**; see *Methods*), and then subsequent stimuli were centered around the  
325 estimated RF location. On average, LPLC1 had a receptive field size of about 30° along both  
326 vertical and horizontal axes, measured as the full-width quarter-maximum value of the Gaussian  
327 fits (**Fig. 3E**). In addition, the response of LPLC1 neurons to stimuli used for RF mapping were  
328 significantly direction selective in the back-to-front and up directions (**Fig. 3F**).

329 We then measured the size tuning of LPLC1 by presenting horizontally translating rectangular  
330 objects with various heights and widths (**Fig. 3G-J**). This resulted in a tuning curve peaking at 10°  
331 of height (**Fig. 3H**), similar to several known lobula VPN types (Keleş and Frye, 2017; Städle et  
332 al., 2020; Tanaka and Clark, 2020). We confirmed that the LPLC1-dependent component of the  
333 slowing behavior is also tuned to small vertical sizes in an additional behavioral experiment (**Fig.**  
334 **S2C-F**). This was in contrast to slowing caused by LPC1 neurons, another back-to-front selective  
335 visual projection neuron (Eliason, 2017; Isaacson, 2018), revealing a complementary vertical size  
336 tuning between LPLC1 and LPC1 (**Fig. S2C-F**). On the other hand, LPLC1 was not tuned to  
337 objects with narrow width: rather, responses of LPLC1 increased up until the width of about 30°  
338 and saturated beyond that width (**Fig. 3I, J**). LPLC1 showed relatively broad tuning to object  
339 velocity and tuning for low flicker frequencies (**Fig. S2G-J**).

340 Next, we asked whether LPLC1 is itself sensitive to the relative motion between the objects and  
341 the background, as we found in the LPLC1-dependent slowing behavior (**Fig. 1L-O**). To test this,



342 we measured LPLC1's response to traveling squares over rotating checkerboard backgrounds  
343 similar to the stimuli used in the behavioral experiment (**Fig. 1M**). Overall, addition of moving  
344 background, especially fast ones, generally suppressed the response of LPLC1 neurons (**Fig. 3K,**  
345 **L**), similar to the behavioral slowing responses. Again, similar to the behavioral results, LPLC1  
346 responded significantly more to back-to-front objects on backgrounds moving against rather than  
347 with the objects (**Fig. 3M**). This effect was weaker and not significant for front-to-back objects.  
348 This result suggests that the sensitivity to relative motion observed in the collision avoidance  
349 behavior is already computed at the level of LPLC1 calcium signals.

350 Lastly, we asked if the direction selectivity of LPLC1 population is spatially biased, a potential  
351 adaptation to the geometry of collisions (**Fig. 1C**) and a bias observed in the behavioral  
352 experiments (**Fig. 1P-R**). To this end, we recorded calcium responses in lobula dendrites of LPLC1  
353 to rectangular objects sweeping long horizontal trajectories in either direction. We then calculated  
354 the direction selectivity of each dendritic ROI and plotted it against its estimated receptive field  
355 location (**Fig. 3N**). Direction selectivity of each ROI was quantified as direction selectivity index  
356 (DSI), calculated as the difference divided by the sum of its peak responses to stimuli moving in  
357 the front-to-back and back-to-front directions. Across flies, we found a strong correlation between  
358 the direction-selectivity of LPLC1 neurons and their azimuthal location (**Fig. 3N, O**), consistent  
359 with our earlier behavioral results. Thus, LPLC1 neurons are most direction selective in the regions  
360 of the visual field where direction is most predictive of a potential collision.

361

362

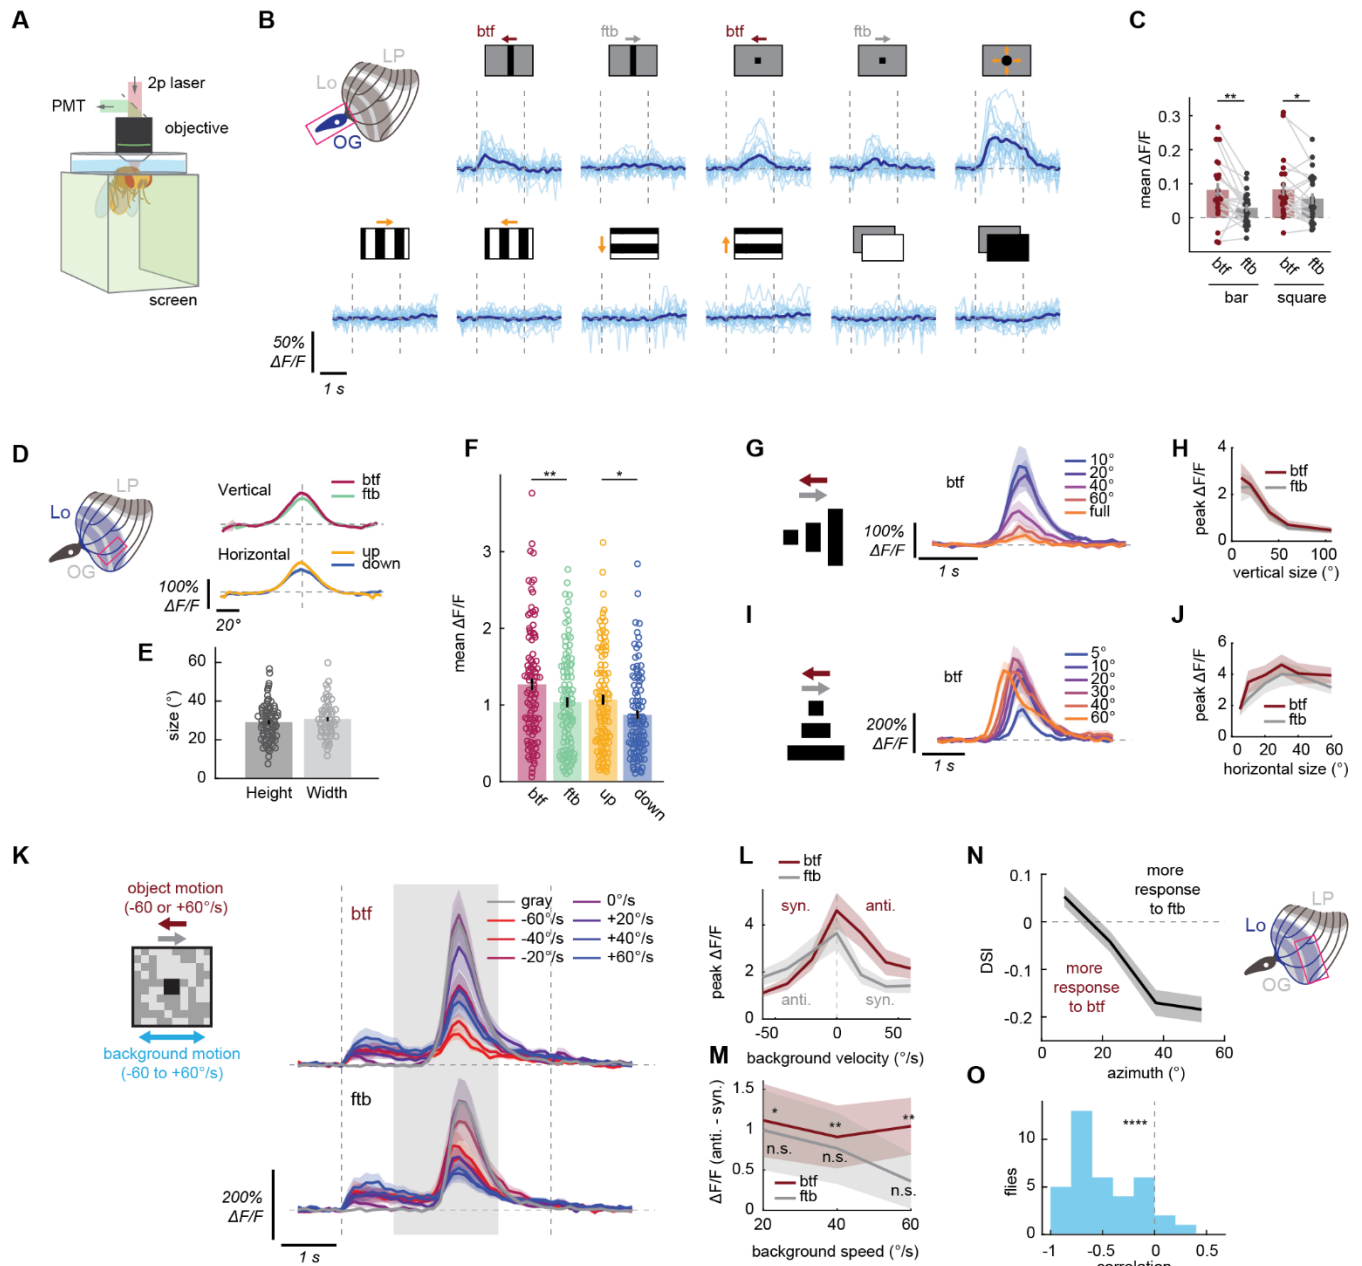

363 **Figure 3. Physiological response properties of LPLC1 match the tuning of the collision**  
 364 **avoidance behavior.**

365 (A) Schematic of the imaging setup.

366 (B) Individual (light blue) and fly-averaged (dark blue) calcium responses of LPLC1 population  
 367 over time to a variety of visual stimuli (horizontally moving bars and squares, looming, square  
 368 wave gratings, full-field flashes). Leftward in the stimulus schematics correspond to the back-to-  
 369 front direction.

370 (C) Time-averaged population responses of LPLC1 to horizontally translating bars and squares by  
 371 the stimulus directions. Each dot represents an individual fly, and data from the same fly are

372 connected by a gray line.

373 (D) Cell-averaged spatial tuning curves of LPLC1 main dendritic stalks, measured with translating  
374 black squares. See also **Fig. S2B** for representative examples of calcium responses before  
375 averaging over time.

376 (E) The vertical and horizontal receptive field sizes of individual LPLC1 dendritic stalks, measured  
377 as the full-width quarter-maximum visual angles of Gaussian fit to individual spatial tuning curves.

378 (F) Time-averaged responses of individual LPLC1 cells to  $10^\circ \times 10^\circ$  black squares that passed  
379 through their receptive field centers.

380 (G-J) Responses of individual LPLC1 cells to horizontally translating rectangular objects with  
381 various (G, H) heights and (I, J) widths, either as (G, I) functions of time by sizes or (H, J) peak  
382 responses as functions of sizes by directions. Time traces are only shown for the back-to-front  
383 directions.

384 (K-M) LPLC1 cells responses to translating objects on rotating backgrounds, similar to behavioral  
385 results in **Fig. 1L-O**. (K) Responses over time to different object directions and background  
386 velocities. Vertical dotted lines and the shaded region respectively indicate the on-/offset of the  
387 background and the period during which the object was moving. (L) Peak calcium response as  
388 functions of background velocity, by the directions of the object. Positive velocity is in the same  
389 direction as front-to-back. (M) Differences of peak calcium responses between when the  
390 background was moving with and against the object, for each background speed.

391 (N) Average direction selectivity index (DSI) of lobula dendritic ROIs of LPLC1 expressing  
392 jGCaMP7b, as a function of their estimated azimuthal receptive field center location.

393 (O) The distribution of correlation between receptive field location and direction selectivity.

394 Error bars and shading around mean traces all indicate standard error of the mean across flies (C,  
395 N, O) or cells (D-M). (B, C) N = 22 flies. (D-F) N = 80 (vertical), 60 (horizontal) cells. (G, H) N  
396 = 16 cells. (I, J) N = 12 cells. (K-M) N = 17 cells. (N, O) N = 37 flies. n. s.: not significant ( $p$   
397  $> .05$ ); \*:  $p < .05$ ; \*\*:  $p < .01$ ; \*\*\*:  $p < .001$ ; \*\*\*\*:  $p < .0001$  in Wilcoxon signed-rank (C, M, O)  
398 or rank sum test (F).

399

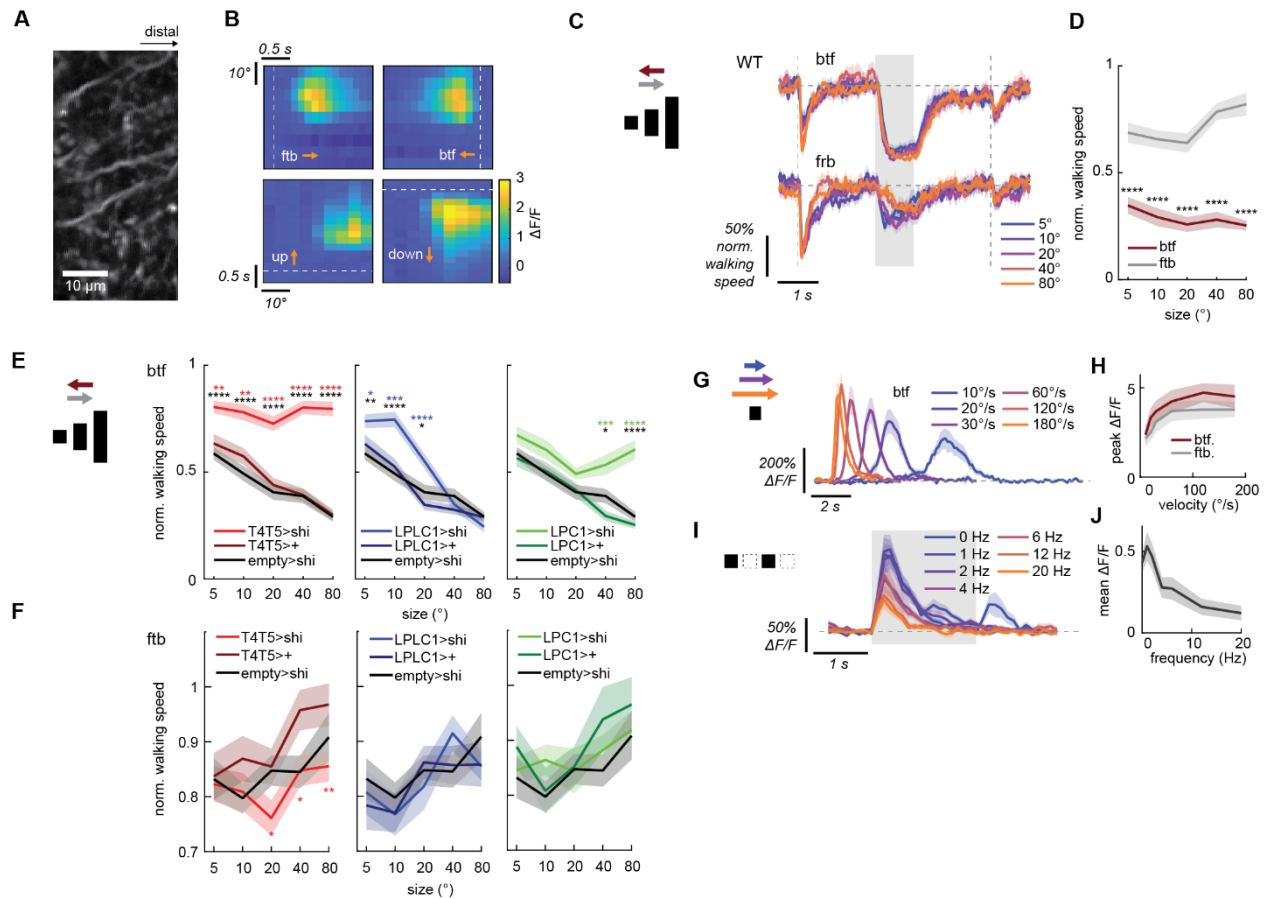

400

401 **Supplementary Figure 2. Additional characterizations of LPLC1 cell response properties**  
 402 **and their behavioral consequences. (Related to Fig. 3.)**

403 (A) A representative time-averaged image of LPLC1 lobula neurites during single cell recordings.

404 (B) Responses of an example cell to receptive field mapping stimuli (a  $10^\circ \times 10^\circ$  translating black  
 405 square). The square swept a  $40^\circ \times 40^\circ$  area around the approximated RF center in the four  
 406 directions with the resolution of  $5^\circ$ .

407 (C, D) Wildtype fly slowing response to horizontally translating objects with different heights in  
 408 either direction, either (C) over time or (D) as functions of the heights. Flies slow more in response  
 409 to objects moving back-to-front across the all sizes tested.

410 (E) Slowing responses of flies with (left) T4/T5, (middle) LPLC1, or (right) LPC1 silenced and  
 411 their respective controls to objects with various heights, moving back-to-front. While silencing of  
 412 T4/T5 reduces slowing across the all sizes tested, LPLC1 and LPC1 silencing only affects slowing  
 413 caused by short and tall objects, respectively, revealing complementary contributions to behavior  
 414 of these two visual projection neurons.

415 (F) The same as (E), but for objects moving front-to-back, where these manipulations had little  
 416 effect.

417 (G-J) Calcium responses of LPLC1 neurons to small squares either (G, H) translating at various  
418 velocities or (I, J) flickering on the spot at various temporal frequencies, either over time or as  
419 functions of the velocity/temporal frequency.

420 Error bars and shading around mean traces all indicate standard error of the mean across (C-F)  
421 flies or (G-J) cells. (C, D) N = 16 flies. (E, F) N = 21 (T4/T5>shi), 18 (T4/T5>+), 19 (LPLC1>shi),  
422 18 (LPLC1>+), 20 (LPC1>shi), 19 (LPC1>+), 21 (empty>shi) flies. (G, H) N = 11 cells. (I, J) N  
423 = 12 cells. n. s.: not significant ( $p > .05$ ); \*:  $p < .05$ ; \*\*:  $p < .01$ ; \*\*\*:  $p < .001$ ; \*\*\*\*:  $p < .0001$  in  
424 Wilcoxon signed-rank (D) or rank sum test (E, F).

425

426 *LPLC1 receives inputs from T2, T3, and T4/T5*

427 Having characterized physiological response properties of LPLC1 neurons, we next sought to  
428 obtain a mechanistic understanding how LPLC1 achieves these properties by combining its inputs.  
429 To identify neurons presynaptic to LPLC1, we turned to the hemibrain connectome dataset  
430 (Scheffer et al., 2020). First, we aimed to confirm the assumption that LPLC1 neurons receive  
431 inputs from T4/T5 tuned to back-to-front, upward, and downward motion at layers 2, 3, 4 of the  
432 lobula plate (i.e. T4/T5 subtypes b, c, and d) (Wu et al., 2016). While the hemibrain contains only  
433 a small fraction of lobula plate, it contains a large fraction of lobula as well as several labeled  
434 lobula plate tangential cells (LPTCs). Therefore, we hypothesized that we could still identify some  
435 T5 cells and examine their connectivity to LPLC1. Indeed, guided by their pre- and postsynapse  
436 innervations in lobula and lobula plate, connectivity to known LPTCs (or lack thereof), as well as  
437 their morphology, we were able to identify approximately 40 to 50 T5 cells in each of the four  
438 subtypes (**Fig. 4A, S3A**) (See *Methods* for details). See **Supplementary File 1** for the complete  
439 list of identified T5 cells. About 20% of the all identified T5b, c, and d cells synapsed onto  
440 identified LPLC1 cells, with the total synapse counts of about 50 per type (**Fig. 4B**). In contrast,  
441 we found only two synapses from T5a cells to LPLC1 (**Fig. 4B**). This observation supports the  
442 hypothesis that LPLC1 receives inputs from T5 at all layers of lobula plate it innervates (i. e.,  
443 layers 2, 3, and 4). Beyond those anatomical connections, to confirm the functional connectivity  
444 between T4/T5 and LPLC1, we optogenetically activated the T4/T5 cells expressing Chrimson  
445 (Klapoetke et al., 2014) with a diode laser, while monitoring the axonal calcium activity of LPLC1  
446 with jGCaMP7b. As expected, activation of T4/T5 resulted in large LPLC1 calcium transients in  
447 flies fed with ATR compared to negligible transients in control animals without ATR (**Fig. 4C, D**).

448 Next, we tried to identify lobula neuron types providing excitatory inputs to LPLC1, specifically  
449 focusing on small-field columnar neurons. The hemibrain dataset does not contain most of the  
450 medulla neuropil. Thus the overwhelming majority of putative feedforward, columnar neurons that  
451 provide input to lobula (e.g., transmedullar (Tm) cells) are only partially reconstructed and are  
452 unlabeled. However, close inspection of their fragmented terminals can still offer useful insight  
453 into the input circuit organization of lobula VPNs (Tanaka and Clark, 2020). Here, we ran a  
454 connectivity- and morphology-based agglomerative hierarchical clustering on ~1,000 fragmented  
455 terminals presynaptic to LPLC1, which likely represent feedforward excitatory inputs into LPLC1  
456 and accounted for 25% of the lobula postsynapses in LPLC1 cells (**Fig S3B**; see *Methods* for  
457 details and **Supplementary File 2** for the complete results). Among the identified putative  
458 presynaptic cell types, of particular interest were T2 and T3 (Fischbach and Dittrich, 1989) (**Figs.**  
459 **4E, S3B**). T2 and T3 are cholinergic (Konstantinides et al., 2018), small-field ON-OFF cells with  
460 tight size tuning, and they provide excitatory inputs to at least one other object-selective lobula  
461 VPN, LC11 (Keleş et al., 2020; Tanaka and Clark, 2020). We were able to identify 50 putative  
462 T2s and 82 putative T3s among the fragmented terminals analyzed here, which respectively had  
463 393 and 532 total synapses on the entire LPLC1 population we analyzed of 60 cells (**Fig. 4F**).  
464 These numbers combined correspond to about one sixth of all synapses from the ~1,000 small

465 neurite fragments onto LPLC1 analyzed here (**Fig. 4F**). Overall, the connectomic analyses here  
466 suggest that LPLC1 achieves its direction selective response to small moving objects by pooling  
467 inputs from T2, T3, and T4/T5, among other neurons.

#### 468 *Glutamatergic inhibition creates spatial bias in direction selectivity*

469 Next, we wondered how the spatial bias in direction selectivity of LPLC1 could be implemented.  
470 One possibility is that inhibitory inputs are masking excitatory inputs from T4/T5 in a spatially  
471 biased manner. To characterize inhibitory inputs LPLC1 is receiving, we visualized glutamatergic  
472 signals at LPLC1 dendrites using iGluSnFR (Marvin et al., 2013). Glutamate is one of the major  
473 inhibitory neurotransmitters in the fly brain (Davis et al., 2020; Liu and Wilson, 2013), and several  
474 VPNs are known to receive directionally selective inhibition in lobula plate, including LPLC2  
475 (Klapoetke et al., 2017; Mauss et al., 2015). We first presented flies expressing iGluSnFR in  
476 LPLC1 with a battery of visual stimuli consisting of full-field flashes, drifting square wave gratings,  
477 and vertical bars moving horizontally (**Fig. 4G, H**). We observed glutamatergic signals in both  
478 lobula and lobula plate neurites of LPLC1. Given that LPLC1 is cholinergic (Davis et al., 2020;  
479 Özel et al., 2020), these signals likely represent inputs into, rather than outputs from LPLC1. In  
480 both neuropils, the glutamatergic signals were strongest in response to the bars, moderate in  
481 response to the square waves, and minimal to the flashes (**Fig. 4G, H**). In addition, glutamatergic  
482 inputs in lobula plate, but not at lobula, were direction selective: in lobula plate, back-to-front bars  
483 elicited stronger glutamate signals than front-to-back ones. The front-to-back square wave also  
484 resulted in smaller responses than ones moving in the other three directions. Importantly, the  
485 direction selectivity of these measured glutamatergic signals is *syn-directional* with the preferred  
486 directions of LPLC1 itself and its excitatory inputs, unlike other VPNs that receive directionally  
487 opponent excitation and inhibition (Klapoetke et al., 2017; Mauss et al., 2015).

488 To better characterize this unexpected syn-directionally tuned glutamatergic inputs, we mapped  
489 the laminar organization of glutamatergic inputs into LPLC1 in the lobula plate. To do so, we  
490 presented the flies with vertical or horizontal bars translating in the four cardinal directions. Then,  
491 for each direction, we plotted the peak responses of dendritic ROIs against their relative position  
492 in the lobula plate along the distal-proximal axis (see *Methods* for details) (**Fig. 4I, J**). In the  
493 vertical directions, glutamatergic responses to upward motion peaked most distally (near layer 4),  
494 whereas responses to downward motion peaked slightly more proximally (near layer 3) (**Fig. 4J**).  
495 This observation is consistent with the previous documented innervation pattern and directional  
496 tuning of lobula intrinsic neurons LPi3-4 and LPi4-3, which are thought to receive excitatory input  
497 from one layer while providing glutamatergic inhibition in the neighboring layer (Mauss et al.,  
498 2015). In the horizontal directions, the peak of back-to-front responses was adjoining the peak of  
499 down responses proximally, likely corresponding to the layer 2 (**Figs. 4J**). The proximal-most  
500 ROIs (layer 1) showed more response to front-to-back bars than anywhere else (**Figs. 4J**), albeit  
501 with a smaller amplitude. This observation implies the existence of a glutamatergic interneuron  
502 types that receive inputs from T4/T5 in layers 1 or in layer 2 and send outputs locally within the

503 same layer, in contrast to the LPi neurons studied previously (Mauss et al., 2015). We confirmed  
504 that this pattern of intra-layer glutamatergic inhibition in the horizontally selective lobula plate  
505 layers holds true beyond LPLC1 inputs by repeating the same experiment in flies expressing  
506 iGluSnFR pan-neuronally (**Fig. S3D, E**).

507 If these direction selective glutamatergic inputs into LPLC1 are indeed inhibitory, suppressing  
508 them should make LPLC1 more selective to back-to-front stimuli. To test this hypothesis, we  
509 knocked down a subunit of the glutamate-gated chloride channel *GluCla* specifically in LPLC1 by  
510 introducing RNAi (Liu and Wilson, 2013; Molina-Obando et al., 2019) while also overexpressing  
511 *Dicer-2*, which can facilitate mRNA cleavage (Kim et al., 2006). When we presented horizontally  
512 translating dark rectangular objects with various heights to the flies with RNAi, we observed that  
513 the responses of LPLC1 with *GluCla* RNAi to 20° and 40° tall objects were *more* selective for  
514 back-to-front direction compared to control genotype with only *Dicer-2* overexpression (**Fig. 4K-**  
515 **M**). This result confirms the idea that glutamatergic, syn-directional inhibition is suppressing the  
516 direction selectivity of wildtype LPLC1 neurons.

517 Finally, we tested whether this glutamatergic inhibition is responsible for the observed retinotopic  
518 bias in the direction selectivity of LPLC1. To this end, we again introduced *GluCla* RNAi and  
519 *Dicer-2* into LPLC1 and recorded population activity in lobula dendrites in response to objects  
520 moving horizontally. We found that the knock-down of *GluCla* significantly increased direction  
521 selectivity of forward-facing LPLC1 ROIs only (**Fig. 4N**). While the size of the effect was modest,  
522 this observation supports the idea that glutamatergic inhibition creates spatial bias of DSI in  
523 LPLC1. Conceivably, such bias can be inherited from glutamatergic neurons that already have  
524 spatially biased direction selectivity, or achieved *de novo* by the spatial bias in the synaptic strength  
525 between the glutamatergic neurons and LPLC1. To disambiguate these possibilities, we re-  
526 analyzed the iGluSnFR imaging data in lobula plate (**Fig. 4I, J**), and checked the distribution of  
527 azimuthal RF locations for ROIs and their direction selectivity. We found that the azimuthal  
528 location of ROIs did not correlate with their horizontal DSI (**Fig. 4O**), suggesting that the spatial  
529 bias in DSI is not simply inherited from the glutamatergic neurons. Interestingly, the majority of  
530 identified lobula plate ROIs in these iGluSnFR recordings had their RF centers in the frontal visual  
531 field (**Fig. 4P**). While this observation could simply reflect a bias in sampling, it could also favor  
532 the hypothesis that the spatial bias in the distribution of synapses between the glutamatergic  
533 neurons and LPLC1 is creating the bias in direction selectivity.

534



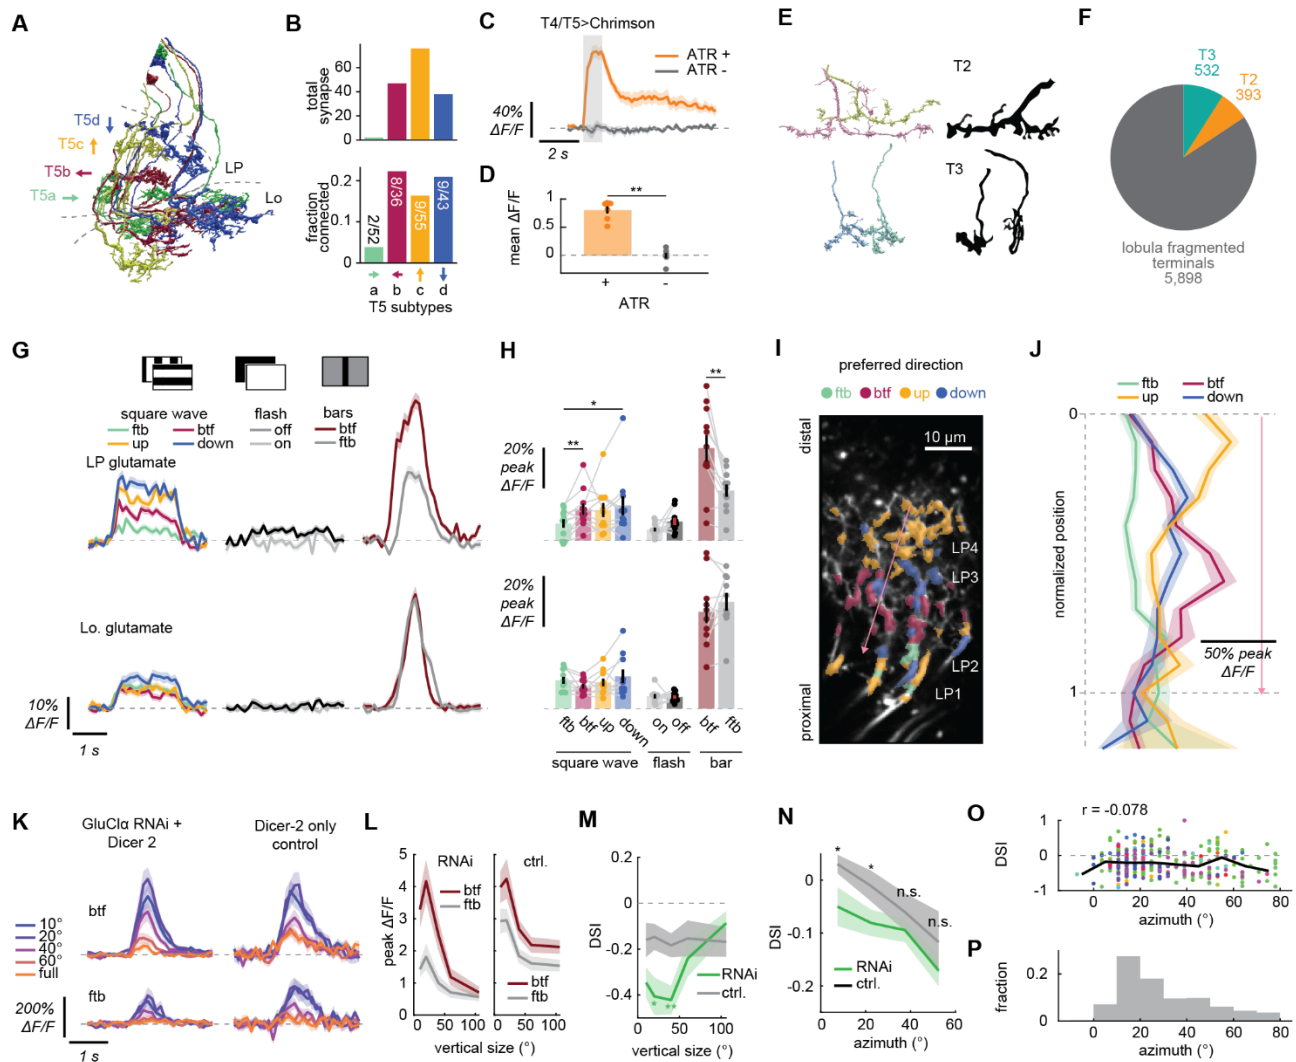

535 **Figure 4. Input circuitry of LPLC1.**

536 (A) Examples of T5 cells in the hemibrain dataset, with the four subtypes coded by different colors.  
 537 Characteristic layered innervation in lobula plate (LP) and somata in lobula plate cortex are visible.  
 538 See also **Fig. S3A**.

539 (B) Connectivity from T5 cells onto LPLC1 by T5 subtypes, quantified by (*top*) the total number of  
 540 synapses and (*bottom*) fraction of identified T5 cells connected to LPLC1.

541 (C, D) Calcium response of LPLC1 to optogenetic stimulation of T4/T5 in flies with or without  
 542 ATR feeding, either as (B) functions of time or (C) time-averaged.

543 (E) Morphology of putative T2 and T3 axons from the hemibrain dataset (*left*), alongside with  
 544 Golgi staining based morphology of T2 and T3 (*right*) (Fischbach and Dittrich, 1989). See  
 545 **Supplementary File 3** for the list of visually annotated T2 and T3.

546 (F) Total number of synapses the LPLC1 population in the hemibrain dataset receives from the  
 547 putative T2 and T3 cells, among the other fragmented lobula terminals analyzed here.

548 (G, H) Glutamate measured with iGluSnFR expressed in LPLC1 cells at (*top*) lobula plate (LP)  
549 and (*bottom*) lobula (Lo) dendrites to a variety of stimuli, either (E) over time or (F) time-averaged.  
550 (I) An example images of lobula plate dendrites expressing iGluSnFR, whose ROIs are color coded  
551 according to the direction of the bar to which they responded best. Approximate location of each  
552 lobula plate (LP) layer is indicated. The pink arrow indicates the axis along which we measured  
553 the normalized positions of ROIs in (J).  
554 (J) Peak glutamatergic signals in lobula plate dendrites, as functions of normalized positions of  
555 ROIs along the layers of lobula plate, measured from the distal most layer.  
556 (K-M) Calcium responses of LPLC1 cells expressing *GluCla* RNAi and their *Dicer-2* only controls  
557 to translating objects with various heights, as in **Figure 3G, H**. (K) Responses over time, by object  
558 sizes and directions. (L) Peak responses as the functions of object sizes, by object directions. (M)  
559 Direction selectivity index of the peak responses as the function of object size, by genotype.  
560 (N) Fly-averaged DSI of LPLC1 expressing *GluCla* RNAi with *Dicer-2* and their *Dicer-2* only  
561 control, as functions of azimuthal RF positions of the ROIs.  
562 (O) DSI of iGluSnFR signals in lobula plate dendrites in response to translating bars, plotted  
563 against the azimuthal RF location of each ROI. ROIs from different flies are in different colors,  
564 and the solid black line indicates median DSI within each 15° bin. DSI showed only weak  
565 correlation with the azimuthal location ( $r = -0.078$ ).  
566 (P) The normalized histogram of azimuthal RF locations of lobula plate ROIs of LPLC1 expressing  
567 iGluSnFR.  
568 Error bars and shades around mean traces indicate standard error of the mean across flies, unless  
569 otherwise noted. (C, D) N = 7 (ATR+), 6 (ATR-) flies. (G, H) N = 11 (LP), 10 (Lo.) flies. (J, O,  
570 P) N = 17 (flies), 366 (ROIs). (K-M) N = 14 (*GluCla* RNAi), 16 (*Dicer-2* only) cells. (N) N = 21  
571 (*GluCla* RNAi), 22 (*Dicer-2* only) flies. n. s.: not significant ( $p > .05$ ); \*:  $p < .05$ ; \*\*:  $p < .01$ ; \*\*\*:  
572  $p < .001$ ; \*\*\*\*:  $p < .0001$  in Wilcoxon signed-rank (H) or rank sum test (D, M, N). Non-significant  
573 pairs are not indicated in (H) for visual clarity.

574

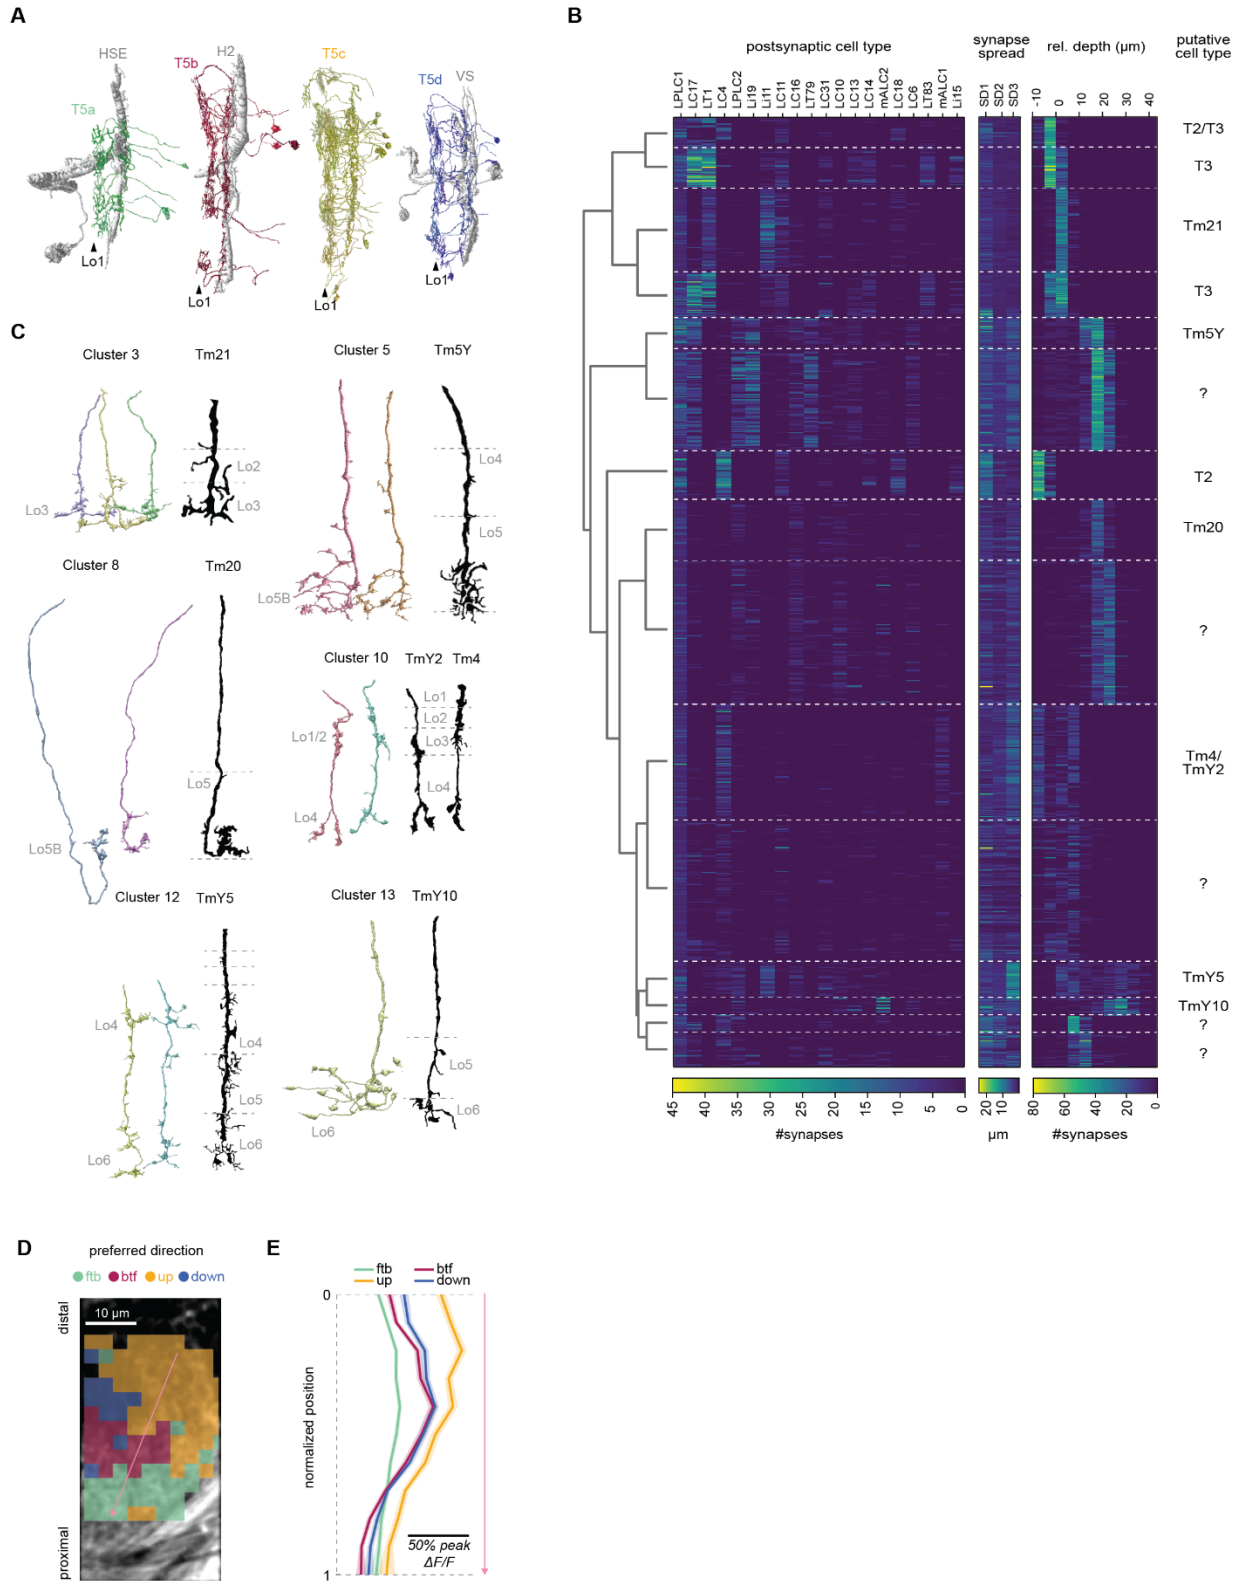

575

576 **Supplementary Figure 3. Additional characterization of LPLC1 inputs. (Related to Fig. 4)**

577 (A) Example T5 cells grouped by their subtypes, with their postsynaptic tangential neurons.

578 (B) Three feature matrices used for lobula terminal clustering, representing (*left*) connectivity to  
579 downstream cell types, (*middle*) spatial spread of synapses along the three axes, and (*right*)  
580 innervation depth relative to LT1 are shown. Each row corresponds to a single terminal fragment.  
581 The dendrogram on the left shows the result of the agglomerative clustering. The putative cell type  
582 labels are shown on the right. Only the top 20 postsynaptic cell types are visualized. See also  
583 **Supplementary File 2**.

584 (C) Reconstructed single-cell morphology of example neurons from clusters that resembled known  
585 cell types, alongside previously published Golgi-staining (in black) (Fischbach and Dittrich, 1989).

586 (D) An example image of lobula plate expressing iGluSnFR panneuronally (nSyb > iGluSnFR),  
587 in which ROIs are color coded according to the direction of the bar to which they responded best,  
588 similar to **Fig. 4I**.

589 (E) Peak glutamatergic signals in lobula plate, as functions of normalized positions of ROIs along  
590 the layers of lobula plate, measured from the distal most layer. Similar to **Fig. 4J**. Glutamate  
591 signals in the near layer 1 (normalized position 1) responded more to front-to-back than back to  
592 front, while closer to layer 2, the back-to-front signals are larger, suggesting intra-layer glutamate  
593 signaling. N = 17 (flies), 1595 (ROIs).

594

595

596 *A downstream pathway that mediates collision avoidance faithfully inherits LPLC1's response*

597 In a last set of experiments, we aimed to identify pathways downstream of LPLC1 that transmit  
598 signals responsible for the collision avoidance behavior. We focused our experiments on five  
599 major neuron types postsynaptic to LPLC1: DNp03, DNp06, PVL112/113, and PLP219 (**Figs.**  
600 **5A, S4A**), which could be selectively labeled by split Gal4 lines (Namiki et al., 2018), including  
601 ones we newly generated (see *Methods* for details) (**Figs. 5B, S4B**). These five cell types accounted  
602 for more than half of total LPLC1 outputs (approximately 9,500 out of 17,000 total synapses) and  
603 about 70% of total central brain outputs of LPLC1 (approximately 14,000 synapses) (**Fig. S4C**).  
604 Of these neurons, the two descending neuron types, DNp03 and 06 were promiscuous in receiving  
605 inputs from VPNs. In addition to LPLC1, DNp03 receive inputs from LPLC4 and LC4, and DNp06  
606 from LC4, 6, and 31. In contrast, the interneurons PVL112/113 and PLP219 receive about one  
607 half of their inputs from LPLC1. We treated PVL112 and 113 as a single group, because they  
608 share very similar connectivity and morphology, and our split Gal4 line appeared to label both,  
609 based on the number of cell bodies (4 and 3 PVL112 and 113 are respectively reported in the  
610 hemibrain dataset, and the split Gal4 line typically labeled 7 PVL112 cells per hemisphere) (**Fig.**  
611 **S4A, B**).

612 To test whether any on these downstream neurons is necessary or sufficient for the collision  
613 avoidance behavior, we repeated synaptic silencing and optogenetic activation experiments  
614 identical to those we performed for LPLC1 (**Fig. 2**). Somewhat surprisingly, given how these four  
615 neuron types receive the majority of LPLC1 outputs, silencing of none of the four with *shibire<sup>ts</sup>*  
616 resulted in any significant change in slowing response to the parallel stimuli in either direction  
617 (**Figs. 5C, D, S4D, E**). In contrast, optogenetic activation of PLP219 with Chrimson caused flies  
618 to slow significantly (**Figs. 5E, F, S4F, G**), similar to activation of LPLC1 (**Fig. 2G-I**). The results  
619 show that activity of PLP219 is sufficient to trigger slowing in the absence of visual inputs, while  
620 its output is not necessary and is likely redundant with other parallel pathways, which could also  
621 include neurons that we did not include in the present survey.

622 Finally, to characterize the visual response properties of PLP219 neurons, we imaged the calcium  
623 activity of their putative dendrites with jGCaMP7b (**Fig. 5G**) while presenting the same broad  
624 battery of stimuli we used for the initial glomerular imaging of LPLC1 (**Fig. 3B**). Overall, the  
625 pattern of PLP219's responses closely matched those of LPLC1 axon terminals, where they  
626 responded to moving bars, squares, and expanding discs, but not to full-field stimuli (**Figs. 3B,**  
627 **5G**). This was in contrast to PVL112/113 neurons, which responded to a broader set of stimuli,  
628 including drifting gratings and flashes (**Fig. S4H**). In summary, PLP219, a downstream pathway  
629 of LPLC1 that mediates collision avoidance, inherits the response property of LPLC1 faithfully  
630 than another parallel pathway.

631

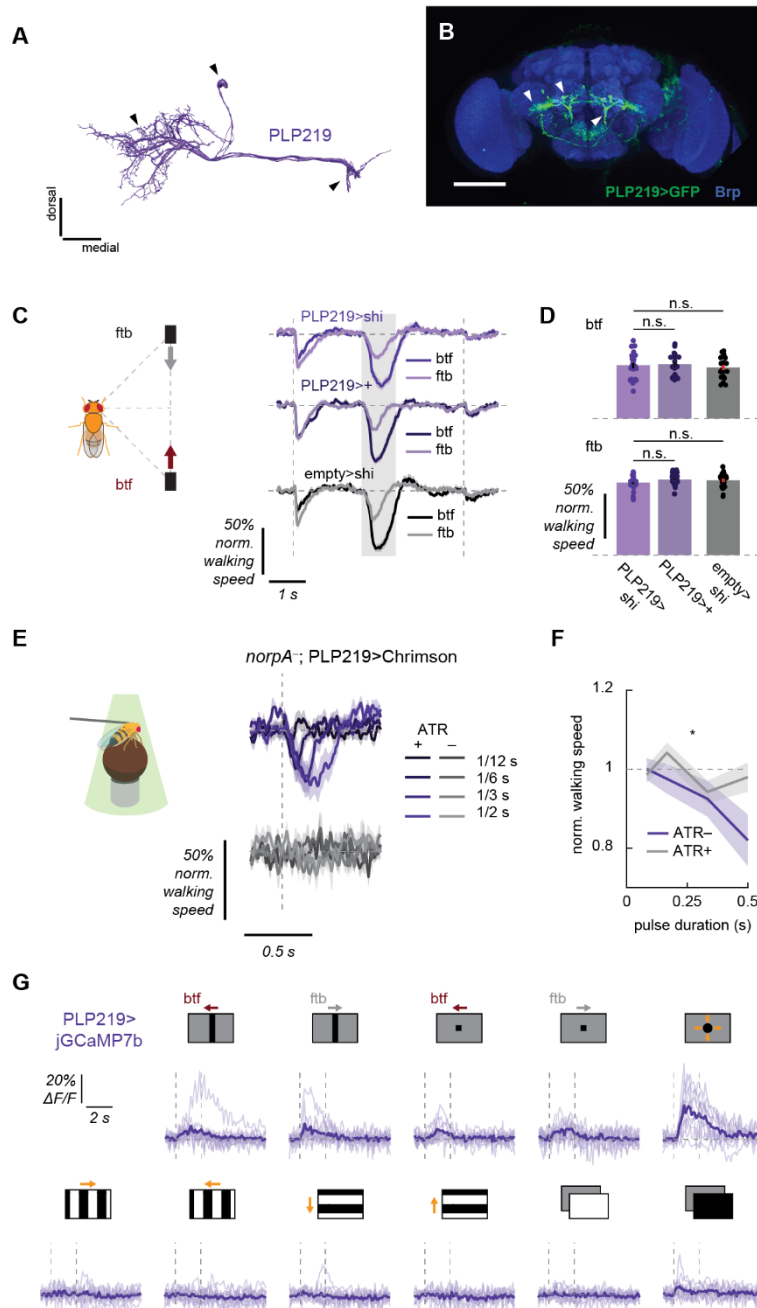

632

633 **Figure 5. A central brain pathway for collision avoidance.**

634 (A) Reconstructed morphology of PLP219 neurons, viewed from the front.

635 (B) The expression pattern of a newly generated PLP219 split Gal4 line (VT041832AD,  
636 VT021792DBD > UAS-myrr::GFP). The corresponding structures are marked by the arrows  
637 between (A) and (B).

638 (C, D) Walking responses of PLP219 silenced flies and their controls in response to the parallel

639 stimuli, (C) over time or (D) averaged over time.  
640 (E, F) Walking responses of PLP219>Chrimson flies with or without ATR feeding in response to  
641 pulses of green light with different durations, either (C) over time or (D) time-averaged.  
642 (G) Individual fly (light purple) and averaged (dark purple) calcium responses of PLP219  
643 population over time to a variety of visual stimuli (horizontally moving bars and squares, looming,  
644 square wave gratings, full-field flashes). Leftward in the stimulus schematics correspond to the  
645 back-to-front direction.  
646 Error bars and shades around mean traces all indicate standard error of the mean. (C, D) N = 20  
647 (PLP219>shi), 19 (PLP219/+), 22 (empty/shi). (E, F) N = 15 (ATR+), 13 (ATR-). (G) N = 11. n.  
648 s.: not significant \*:  $p < .05$  in (D) Wilcoxon signed-rank test or (F) 2-way analysis of variance  
649 (ANOVA) (the main effect of ATR conditions).  
650

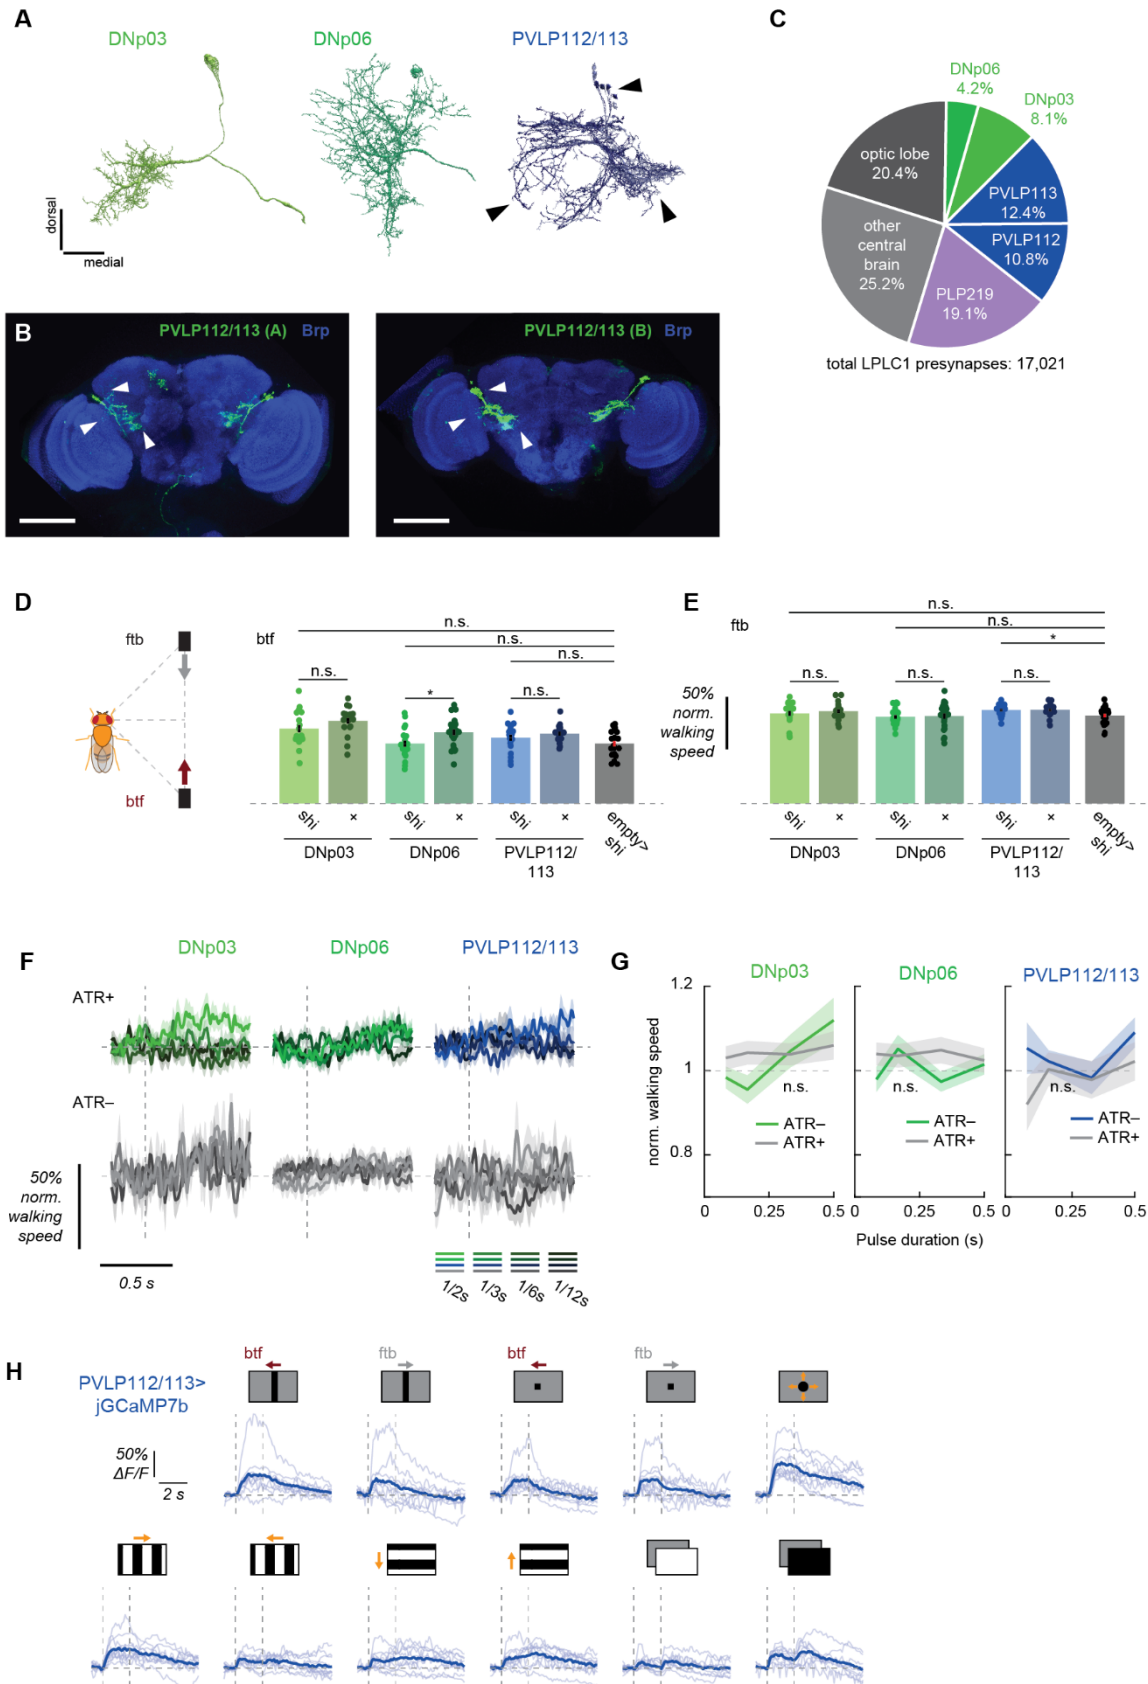



652 **Supplementary Figure 4. Neurons downstream of LPLC1. (Related to Fig. 5)**

653 (A) Reconstructed morphology of DNp03, DNp06, and PLP112/113 from the hemibrain dataset  
654 (Scheffer et al., 2020).

655 (B) The expression patterns of two newly generated split Gal4 lines to label PVLP112/113 neurons,  
656 visualized with UAS-myr::GFP. (*left*) R72A10AD; VT002042DBD (*right*) R72A10AD;  
657 VT019749DBD. The first driver was used for the behavioral experiments.

658 (C) Counts of LPLC1 output synapses by postsynaptic cell types.

659 (D, E) Time-averaged normalized walking responses of flies to the parallel stimulus in (D) back-  
660 to-front and (E) front-to-back directions, with noted downstream neuron silenced and  
661 corresponding controls.

662 (F, G) Normalized walking responses of flies expressing Chrimson in PVLP112/113, DNp03, or  
663 DNp06 to pulses of green lights, visualized (F) over time or (G) averaged over time.

664 (H) Individual (light blue) and fly-averaged (dark blue) calcium responses of PVLP112/113  
665 population over time to a variety of visual stimuli (horizontally moving bars and squares, looming,  
666 square wave gratings, full-field flashes). Leftward in the stimulus schematics corresponds to the  
667 back-to-front direction.

668 Error bars and shades around mean traces all indicate standard error of the mean. (D, E) N = 17  
669 (DNp03>shi), 19 (DNp03>+), 19 (DNp06>shi), 24 (DNp06>+), 19 (PVLP112/113>shi), 17  
670 (PVLP112/113>+), 22 (empty>shi). (F, G) N = 14 (DNp03, ATR+), 13 (DNp03, ATR-), 13  
671 (DNp06, ATR+), 15 (DNp03, ATR-), 12 (PVLP112/113, ATR+), 6 (PVLP112/113, ATR-). (H)  
672 N = 10. n. s.: not significant ( $p > .05$ ); \*:  $p < .05$ ; \*\*:  $p < .01$ ; \*\*\*:  $p < .001$ ; \*\*\*\*:  $p < .0001$  in  
673 Wilcoxon rank sum test (D, E) and 2-way analysis of variance (ANOVA) (G; the main effect of  
674 ATR conditions).

675

676

## 677 **Discussion**

678 In the present study, we explored a collision avoidance behavior in walking *Drosophila* and its  
679 underlying circuit mechanisms as a simple model of motion-based spatial vision. Using high-  
680 throughput psychophysics experiments, we demonstrated that back-to-front motion in the  
681 frontolateral visual field—a geometrical cue for near collision—causes slowing in walking flies  
682 (**Fig. 1**). Using genetic silencing and activation experiments, we showed that the visual projection  
683 neuron LPLC1 is necessary for this putative collision avoidance behavior and its activity is  
684 sufficient to cause slowing in walking flies (**Fig. 2**). Physiological response properties of LPLC1  
685 mirrored the visual tuning of the slowing behavior, most notably in its spatial bias in direction  
686 selectivity (**Fig. 3**), which was also consistent with the geometry of near collisions. Using  
687 connectomic analyses, optogenetics, and neurochemical imaging and manipulation, we showed  
688 that object-selective T2 and T3 inputs are pooled with direction-selective T4/T5 inputs, likely  
689 establishing the object- and direction-selectivity of LPLC1, while spatially biased glutamatergic  
690 inhibition creates its position-dependent tuning (**Fig. 4**). Lastly, we identified a downstream neuron  
691 of LPLC1 called PLP219 to be sufficient to cause slowing, and to inherit the response property of  
692 LPLC1 faithfully (**Fig. 5**).

693

### 694 *Positional cues for threat detection and collision avoidance*

695 As objects move relative to an observer, the apparent size and position of the object systematically  
696 change as dictated by geometry. How animals detect change in object size and use it to avoid  
697 predation has been well studied in various vertebrate species ranging from primates (Schiff et al.,  
698 1962), rodents (De Franceschi et al., 2016; Kim et al., 2020; Yilmaz and Meister, 2013), birds (Sun  
699 and Frost, 1998), and fish (Temizer et al., 2015), as well as in insects (Card and Dickinson, 2008;  
700 Gabbiani et al., 1999, 2002; Klapoetke et al., 2017; von Reyn et al., 2014). In contrast, less is  
701 known about how and when animals use positional changes or directional motion to detect and  
702 avoid collision with moving objects. In general, positional changes of moving objects are more  
703 salient than their changes in apparent size: One can show that the maximum apparent expansion  
704 rate of an object with radius  $R$  moving at a given speed is always less than its maximum apparent  
705 translational velocity when the object is more than  $R$  away from the observer (see *Methods* for  
706 calculation). Moreover, the ratio between the maximal translation rate and the maximal expansion  
707 rate can become arbitrarily large as the object is further and further from the observer (see *Methods*  
708 for calculation). Intuitively, these results correspond to the fact that one can easily tell whether  
709 someone 100 meters away is running to the right or left, while it is difficult to tell if that same  
710 person is running towards or away from you, based solely on visual motion. This saliency of  
711 translation rates is likely one reason that aerial predators employ interception strategies that  
712 minimize their apparent positional shifts on their prey's retinæ (Ghose et al., 2006; Kane and  
713 Zamani, 2014; Mischiati et al., 2015). Less sophisticated pursuit strategies, often used in non-  
714 predatory chasing among conspecifics (Chiu et al., 2010; Land, 1993), generate positional changes

715 that can be used by pursuees to detect pursuers. Note that even predators that employ sophisticated  
716 strategies will suffer from positional changes after sudden turns of the prey until they settle into a  
717 new interception course.

718 Positional changes are therefore a useful cue to simply detect objects such as conspecifics and  
719 predators, but back-to-front motion in particular can be predictive of future collisions. This is  
720 because approaching objects appear to be moving back-to-front only when they will cross the path  
721 of the observer in front, which would then pose collision risks if the object slows or stops. We  
722 empirically confirmed this conjecture by running a simple simulation with randomized trajectories  
723 (**Fig. 1C**). Based on this geometrical argument, we interpret the direction selective slowing  
724 behavior of the flies studied here as a collision avoidance behavior. This is in contrast to other  
725 object motion-triggered freezing behaviors in both flies (Tanaka and Clark, 2020) and mice (De  
726 Franceschi et al., 2016), which are not selective for stimulus direction and thus are unlikely to be  
727 a specific response to predicted collision.

#### 728 *Retinotopic bias in LPLC1 matches the geometry of collisions*

729 In this study, we found retinotopic biases in the direction selectivity of both behaviors and neural  
730 processing. First, the direction selectivity of the collision avoidance slowing to the back-to-front  
731 direction was more pronounced in the frontolateral visual field. In addition, direction selectivity  
732 of LPLC1 neurons also strongly correlated with the azimuthal location of their receptive field.  
733 Since the frontolateral visual field is where back-to-front motion is most predictive of immediate  
734 collision (**Fig. 1C**), the spatial bias in the LPLC1 circuitry can be seen as an adaptation to this  
735 geometry.

736 Retinotopic biases in visual processing have been found in diverse species. For example, in  
737 vertebrate retinae, circuit features such as opsin expression, dendritic morphology, and synaptic  
738 strengths can all vary systematically across visual space, depending on species (Bleckert et al.,  
739 2014; Heukamp et al., 2020). It is also well established that features such as receptive field sizes  
740 (Harvey and Dumoulin, 2011) and orientation selectivity (Sasaki et al., 2006) exhibit retinotopic  
741 biases in primate visual cortices. Although these biases have been variously speculated to be  
742 adaptations to unique sensory ecology of different species, few were connected to strong  
743 geometrical explanations or to behavior. Importantly, the geometrical justification we provided  
744 here for the spatial bias in direction selectivity for collision detection is not specific to flies. Thus,  
745 it is likely that similar biases exist in other sighted species, arrived at through convergent evolution.  
746 Indeed, rodent superior colliculus—a center of visual threat detection—has been reported to  
747 exhibit a similar retinotopic bias where back-to-front and upward motion is overrepresented in the  
748 upper lateral visual field (Li et al., 2020), likely mirroring the geometry of approaching overhead  
749 predators.

750

751 *Other behavioral functions of LPLC1 neurons*

752 Although here we focused on LPLC1's involvement in collision avoidant slowing behavior in  
753 walking flies, this does not preclude the possibility that LPLC1 is involved in different behavioral  
754 programs in other sensory and behavioral contexts. Supporting this idea, we found multiple  
755 downstream neurons of LPLC1 whose activation did not result in slowing and also had divergent  
756 visual response properties. Indeed, a previous study reported that strong optogenetic activation of  
757 LPLC1 can lead to behavioral phenotypes other than slowing, such as jumping (Wu et al., 2016).  
758 Descending neurons DNp03 and DNp06, which receive inputs from other loom-sensitive, jump-  
759 inducing VPNS (LC4, LC6), make good candidates for the neural basis of such jumping  
760 phenotypes.

761 An interesting question is how the activation of LPLC1 neurons by different stimuli (e. g., small  
762 objects moving back-to-front vs. looming objects) results in different behavioral responses. For  
763 example, one can imagine that the activation of LPLC1 without activation of other loom sensitive  
764 cells (e.g., LC4, LC6) is decoded as the presence of a conspecific in a collision course to initiate  
765 slowing, whereas simultaneous activation of LPLC1 alongside other loom detectors strongly  
766 implies predators and thus triggers rapid escape. How such population-level decoding and  
767 behavioral decision-making is implemented through the network of interglomerular local neurons  
768 (Mu et al., 2012) is of particular interest for future studies.

769

770 *Convergence of motion and object detectors*

771 In flies, the lobula complex consists of the lobula and lobula plate, which are the highest order  
772 brain neuropils that remain specialized for visual processing. Among these two neuropils, lobula  
773 plate has been historically under intensive study as the neural basis of visual motion detection and  
774 stabilization reflexes (Hausen, 1976; Maisak et al., 2013), while the functions of the lobula  
775 neuropil have remained less clear. The recent series of studies on lobula output neurons (Keleş and  
776 Frye, 2017; Klapoetke et al., 2017; Morimoto et al., 2020; von Reyn et al., 2017; Ribeiro et al.,  
777 2018; Städele et al., 2020; Tanaka and Clark, 2020; Wu et al., 2016) have started to show that these  
778 neurons detect ethologically relevant objects, like mates and predators, to drive specific behavioral  
779 programs. Visual projection neurons innervating both lobula and lobula plate, including LPLC1,  
780 are uniquely situated to integrate these object and motion signals. Here, we showed that LPLC1  
781 likely pools inputs from motion- and object-detecting interneurons (T4/T5 and T2/T3 neurons) to  
782 construct a more complex visual feature. While there are other visual projection neuron types  
783 spanning lobula plate and lobula whose physiology have been studied (for instance, LPLC2  
784 (Klapoetke et al., 2017), LLPC1 (Isaacson, 2018)), lobula inputs to those neurons remain to be  
785 explored.

786 Interestingly, a similar computational motif of convergence between motion- and object-detecting  
787 pathways seems to be present in the early visual systems of vertebrates as well. Vertebrate retinae

788 are equipped with retinal ganglion cells selective for motion directions (Barlow and Hill, 1963) as  
789 well as small objects (Ölveczky et al., 2003; Semmelhack et al., 2014; Zhang et al., 2012). The  
790 axon terminals of motion- and object-selective ganglion cells innervate shallowest layers of optic  
791 tectum in zebrafish (Robles et al., 2014) as well as of superior colliculus in mice (Hong et al.,  
792 2011). While the internal circuitry of the optic tectum / superior colliculus is still not well  
793 understood, physiological studies on the neural bases of prey capture in larval zebrafish have  
794 identified tectal neurons that show direction selective responses to small objects similar to LPLC1  
795 (Antinucci et al., 2019; Bianco and Engert, 2015; Förster et al., 2020). Similarly, narrow field  
796 neurons in mouse superior colliculus, which are also necessary for prey capture behavior, exhibit  
797 direction selectivity as well as tight tuning to small object sizes (Hoy et al., 2019). These results  
798 suggest that integration of motion- and object-detector outputs similar to LPLC1 indeed takes place  
799 in the optic tectum / superior colliculus. Parallels between vertebrates and invertebrates in the early  
800 layers of visual processing and motion detection have been noted (Borst and Helmstaedter, 2015;  
801 Clark and Demb, 2016; Sanes and Zipursky, 2010). The findings reported here extend the  
802 computational analogies between insect and vertebrate visual systems to the motif of initial  
803 segregation and subsequent convergence of motion and object detecting pathways to drive  
804 specialized object-detection behaviors.

805

806 **Acknowledgements**

807 We thank the members of the Clark lab as well as A. Nandy, J. Jeanne, and L. Liang for helpful  
808 comments and discussions. RT was supported by the Takenaka Foundation and the Gruber  
809 Foundation. DAC and this project were supported by NIH R01EY026555, NIH R01NS121773,  
810 and NIH P30EY026878.

811

## 812 **Methods**

### 813 *Resource Table*

| Reagent                                                     | Source                                         | Identifier            |
|-------------------------------------------------------------|------------------------------------------------|-----------------------|
| <b>Antibodies</b>                                           |                                                |                       |
| Anti-brp mouse monoclonal antibody (nc82)                   | Developmental Studies Hybridoma Bank           | RRID: AB2314866       |
| Anti-GFP chicken polyclonal antibody                        | Invitrogen                                     | RRID: AB2534023       |
| Anti-mouse goat polyclonal antibody, Alexa 633 conjugated   | Invitrogen                                     | RRID: AB141431        |
| Anti-chicken goat polyclonal antibody, Alexa 488 conjugated | Invitrogen                                     | RRID: AB142924        |
| Normal goat serum                                           | Abcam                                          | RRID: AB2716553       |
| <b>Chemicals</b>                                            |                                                |                       |
| All-trans retinal                                           | Sigma Aldrich                                  | PubChem SID: 24899355 |
| Vectashield antifade mounting medium                        | Vector Laboratories                            | RRID: AB2336789       |
|                                                             |                                                |                       |
| PBS                                                         | Sigma Aldrich                                  | Cat#: P4417           |
| paraformaldehyde                                            | Sigma Aldrich                                  | Cat#: 252549          |
| Triton-X                                                    | Sigma Aldrich                                  | Cat#: X-100           |
| <b>Model organisms</b>                                      |                                                |                       |
| ++;+                                                        | (Gohl et al., 2011)                            | N/A                   |
| +; UAS-shi <sup>ts</sup> ; UAS-shi <sup>ts</sup>            | (Kitamoto, 2001)                               | N/A                   |
| w; UAS-GCaMP6f; +                                           | (Chen et al., 2013)                            | BDSC: #42747          |
| w; +; UAS-jGCaMP7b                                          | (Dana et al., 2019)                            | BDSC: #79029          |
| w; UAS-iGluSnFR; +                                          | (Marvin et al., 2013) (Gift from Marc Freeman) | N/A                   |
| w; +; UAS-iGluSnFR                                          | (Marvin et al., 2013) (Gift from Marc Freeman) | N/A                   |

|                                                  |                             |                                   |
|--------------------------------------------------|-----------------------------|-----------------------------------|
| w; +; UAS-CsChrimson.mVenus                      |                             | BDSC: #55136                      |
| +; +; LexAop-CsChrimson.tdTomato                 |                             | BDSC: #82183                      |
| y, v; UAS-GluCl $\alpha$ RNAi; UAS-Dicer2        | (Gift from Rudy Behnia)     |                                   |
| +; UAS-Dicer2 / II+                              | (Dietzl et al., 2007)       |                                   |
| w; +; UAS-myr::GFP                               |                             | BDSC: #32197                      |
| w; +; nSyb-Gal4 (pan-neuronal)                   |                             | BDSC: #51941                      |
| w; +; R36B06Gal4 (LPLC1)                         | (Jenett et al., 2012)       | BDSC: #49929                      |
| w; R42F06lexA; + (T4/T5)                         | (Jenett et al., 2012)       | BDSC: #54203                      |
| w; R64G09AD; R37H04DBD (split LPLC1)             | (Wu et al., 2016)           | JRC: OL0029B                      |
| w; R59E08AD; R42F06DBD (split T4/T5)             | (Schilling and Borst, 2015) | JRC: SS00324                      |
| w; R81A05AD; + (for split LPC1)                  | (Davis et al., 2020)        | BDSC: #70821<br>(part of SS02575) |
| w; +; VT031495DBD (for split LPC1)               | (Davis et al., 2020)        | BDSC: #71726<br>(part of SS02575) |
| w; R91C05; R31B08DBD (split DNp03)               | (Namiki et al., 2018)       | JRC: SS01081                      |
| w; VT019018AD; VT017411DBD (split DNp06)         | (Namiki et al., 2018)       | JRC: SS02256                      |
| w; R72A10AD; VT058694DBD (for split PVLP112/113) |                             | BDSC: #86601                      |
| w; +; VT002042DBD (for split PVLP112/113)        |                             | BDSC: #71680                      |
| w; +; VT019749DBD (for split PVLP112/113)        |                             | BDSC: #73774                      |
| w; VT041832AD; + (for split PLP219)              |                             | BDSC: #74313                      |
| w; +; VT021792DBD (for split                     |                             | BDSC: #71916                      |



|                                       |                              |              |
|---------------------------------------|------------------------------|--------------|
| PLP219)                               |                              |              |
| w; AD; DBD (enhancer-less split Gal4) | (Hampel et al., 2015)        | BDSC: #79603 |
| norpA <sup>7</sup> ; +; +             |                              | BDSC: #5685  |
| w, nSyb-phiC31; +; +                  | (Isaacman-Beck et al., 2020) | BDSC: #84150 |
| Software                              |                              |              |
| MATLAB                                | Mathworks                    |              |
| Psychtoolbox 3                        | (Kleiner et al., 2007)       |              |
| ScanImage 5                           | (Pologruto et al., 2003)     |              |
| neuPrint                              | (Clements et al., 2020)      |              |
| Python 3                              |                              |              |
| Fiji                                  |                              |              |

814 *Fly strains and husbandry*

815 Flies were raised at around 50% humidity on a dextrose-based food. Non-virgin female flies were  
816 used for all experiments except for the optogenetic activation in blind flies, where male flies with  
817 single deficient allele of *norpA* on the X chromosome were used for experimental convenience.  
818 Flies for behavior experiments were raised at 20 °C on 12 h light/dark cycle. Adults less than one  
819 day post eclosion were collected with CO<sub>2</sub> anesthesia, and all experiments were performed within  
820 12 to 24 h after staging, with the exception of flies for optogenetics experiments, which were dark-  
821 reared on food with or without 10 μM all-trans retinal (ATR) (de Vries and Clandinin, 2013). All  
822 behavioral experiments were performed within 3 h windows after lights-on or before lights-off.  
823 Flies for imaging experiments were grown at 25 °C. Most flies were staged with CO<sub>2</sub> at least 12 h  
824 prior to the experiments and immobilized with ice before surgery. Flies were typically imaged  
825 between 2 to 7 days post eclosion. Flies for imaging experiments with optogenetics were dark  
826 reared on food with or without ATR for 3 days. In imaging experiments with RNA interference,  
827 only 5 days old flies were used. The genotypes of the flies used for the experiments are summarized  
828 in **Supplementary Table 1**.

829

830 **Supplementary Table 1. Genotypes of flies used in the experiments.**

| Description | Genotype | Figure     |
|-------------|----------|------------|
| wildtype    | +; +; +  | 1, S1ABC , |

|                                               |                                                                            |                              |
|-----------------------------------------------|----------------------------------------------------------------------------|------------------------------|
|                                               |                                                                            | S2CD                         |
| empty>shi                                     | w/+; AD/UAS-shi <sup>ts</sup> ;<br>DBD/UAS-shi <sup>ts</sup>               | 2A-F, 5CD, S1D-I, S2EF, S4DE |
| T4T5>shi                                      | w/+; R59E08AD/UAS-shi <sup>ts</sup> ;<br>R42F06DBD/UAS-shi <sup>ts</sup>   | 2ABEF, 3C, S1DEHIJ, S2EF     |
| T4T5>+                                        | w/+; R59E08AD/+;<br>R42F06DBD/+                                            | 2ABEF, 3C, S1DEHIJ, S2EF     |
| LPLC1>shi                                     | w/+; R64G09AD/UAS-shi <sup>ts</sup> ;<br>R37H04DBD/UAS-shi <sup>ts</sup>   | 2CDEF, 3C, S1DEHIJ, S2EF     |
| LPLC1>+                                       | w/+; R64G09AD/+;<br>R37H04DBD/+                                            | 2CDEF, 3C, S1DEHIJ, S2EF     |
| LPC1>shi                                      | w/+; R81A05AD/UAS-shi <sup>ts</sup> ;<br>VT031495DBD/UAS-shi <sup>ts</sup> | S2EF                         |
| LPC1>+                                        | w/+; R81A05AD /+;<br>VT031495DBD /+                                        | S2EF                         |
| norpA <sup>-</sup> ;<br>LPLC1>Chrimson        | norpA <sup>7</sup> ; R64G09AD/+;<br>R37H04DBD/UAS-CsChrimson.mVenus        | 2HI                          |
| LPLC1>GCaMP6f                                 | +; UAS-GCaMP6f;<br>R36B06Gal4                                              | 3B-M, S2ABG-J                |
| LPLC1>jGCaMP7b                                | +; +; R36B06Gal4 UAS-jGCaMP7b                                              | 3NO                          |
| LPLC1>jGCaMP7b;<br>T4/T5>Chrimson             | w/+; R42F06lexA/+; R36B06Gal4 UAS-jGCaMP7b/LexAop-CsChrimson.tdTomato      | 4CD                          |
| LPLC1>iGluSnFR                                | w/+; R64G09AD/UAS-iGluSnFR;<br>R37H04DBD/UAS-iGluSnFR+                     | 4G-JOP, S3C                  |
| nSyb>iGluSnFR                                 | +; +; nSyb-Gal4/UAS-iGluSnFR                                               | S3D                          |
| LPLC1>GCaMP6f,<br>GluCl $\alpha$ RNAi, Dicer2 | y, v/+; UAS-GCaMP6f/UAS-GluCl $\alpha$ RNAi;<br>R36B06Gal4/UAS-Dicer2      | 4KL                          |
| LPLC1>GCaMP6f, Dicer2                         | +; UAS-GCaMP6f/UAS-Dicer2;<br>R36B06Gal4/+                                 | 4KL                          |

|                                                |                                                                               |      |
|------------------------------------------------|-------------------------------------------------------------------------------|------|
| LPLC1>jGCaMP7b,<br>GluCl $\alpha$ RNAi, Dicer2 | y, v/+; UAS-GluCl $\alpha$ RNAi/+;<br>R36B06Gal4, UAS-jGCaMP7b/UAS-<br>Dicer2 | 4MN  |
| LPLC1>jGCaMP7b, Dicer2                         | +; UAS-Dicer2/+;<br>R36B06Gal4, UAS-jGCaMP7b/+                                | 4MN  |
| PVLP112/113>GFP (A)                            | w/+; R72A10AD/+;<br>VT002042DBD/UAS-myr::GFP                                  | S4B  |
| PVLP112/113>GFP (B)                            | w/+; R72A10AD/+;<br>VT019749DBD/UAS-myr::GFP                                  | S4B  |
| PLP219>GFP                                     | w/+; RVT041832AD/+;<br>VT021792DBD/UAS-myr::GFP                               | 5B   |
| DNp03>shi                                      | w/+; R91C05AD/UAS-shi <sup>ts</sup> ;<br>R31B08DBD/ UAS-shi <sup>ts</sup>     | S4DE |
| DNp03>+                                        | w/+; R91C05AD/+; R31B08DBD/+                                                  | S4DE |
| DNp06>shi                                      | w/+; VT019018AD/UAS-shi <sup>ts</sup> ;<br>VT017411/UAS-shi <sup>ts</sup>     | S4DE |
| DNp06>+                                        | w/+; VT019018AD/+; VT017411/+                                                 | S4DE |
| PVLP112/113>shi                                | +; R72A10/UAS-shi <sup>ts</sup> ;<br>VT002042DBD/UAS-shi <sup>ts</sup>        | S4DE |
| PVLP112/113>+                                  | +; R72A10/+; VT002042DBD/+                                                    | S4DE |
| PLP219>shi                                     | +; VT041832/UAS-shi <sup>ts</sup> ;<br>VT021792/UAS-shi <sup>ts</sup>         | 5CD  |
| PLP219>+                                       | +; VT041832/+; VT021792/+                                                     | 5CD  |
| norpA <sup>-</sup> ; DNp03>Chrimson            | norpA <sup>7</sup> ; R91C05AD/+;<br>R31B08/UAS-CsChrimson.mVenus              | S4FG |
| norpA <sup>-</sup> ; DNp06>Chrimson            | norpA <sup>7</sup> ; VT019018AD/+;<br>VT017411/UAS-CsChrimson.mVenus          | S4FG |
| norpA <sup>-</sup> ;<br>PVLP112/113>Chrimson   | norpA <sup>7</sup> ; R72A10AD/+;<br>VT002042DBD/UAS-CsChrimson.mVenus         | S4FG |

|                                      |                                                                      |     |
|--------------------------------------|----------------------------------------------------------------------|-----|
| norpA <sup>-</sup> ; PLP219>Chrimson | norpA <sup>7</sup> ; VT-41832AD/+;<br>VT021792/UAS-CsChrimson.mVenus | 5EF |
| PLP219>jGCaMP7b                      | w/+; VT041832AD/+;<br>VT021792DBD/UAS-jGCaMP7b                       | 5G  |
| PVLP112/113>jGCaMP7b                 | w/+; R72A10AD/+;<br>VT002042DBD/UAS-jGCaMP7b                         | S4H |
| PVLP112/113>jGCaMP7b                 | w/+; R72A10AD/+;<br>VT019749DBD/UAS-jGCaMP7b                         | S4H |

831

### 832 *Tethered walking psychophysics assay*

833 Previously reported fly-on-the-ball rigs were used to measure fly locomotor responses to visual  
834 stimuli (Creamer et al., 2019). Flies were anesthetized on ice, and tethered to 30G surgical needles  
835 with UV-curable epoxy on their dorsal thorax. The tethered flies were mounted above air-floated  
836 balls, whose rotation were used as a read out of flies' attempted movements. The rotation of the  
837 balls was measured with optical mouse chips at the resolution of ~0.5° and 60 Hz. Visual stimuli  
838 were projected onto panoramic screen covering 270° azimuth and 106° elevation using  
839 Lightcrafter DLP evaluation module (Young Optics) using green light (peak 520 nm and mean  
840 intensity ~ 100 cd/m<sup>2</sup>). The temperature of the rig was set at 36 °C to promote walking and to use  
841 thermogenetic tools.

842 Visual stimuli used in the behavioral experiments were compiled in **Supplementary Table 2**. For  
843 optogenetic stimulation (Creamer et al., 2019), the panoramic screens were removed and the pulses  
844 of green light were directly shone on the flies from the four directions (top, front, left, right). The  
845 mean light intensity was approximately ~10 μW/mm<sup>2</sup>.

### 846 *Behavioral data analysis*

847 Walking speed of the flies were normalized relative to the average walking speed within the 500  
848 ms window prior to each stimulus onset, unless otherwise noted. The time traces of normalized  
849 walking speed and turning angular velocity were then averaged across presentations of each  
850 stimulus type. Walking and turning time traces in response to mirror-symmetric pairs of stimuli  
851 were also averaged in subtractive and additive fashion, respectively. These individual mean time  
852 traces were then averaged over time for statistical comparisons. The window for the averaging  
853 spanned the entire duration of stimuli, unless otherwise noted in the caption. In addition, group  
854 mean time traces and standard error of the mean were calculated from the individual mean time  
855 traces to visualize the dynamics of the responses.

856 *Two-photon imaging*

857 For imaging experiments, flies were cold anesthetized and head-fixed into a metal shim with UV  
858 curable epoxy. The brain was exposed by surgically removing cuticle, fat tissue, and trachea on  
859 the back of the head. All recordings were performed on the right side of the brain. The mouth parts  
860 were fixed with the epoxy to minimize the brain movement. The exposed brain was submerged  
861 under oxygenated sugar-saline solution (Wilson et al., 2004). Imaging was performed with a two-  
862 photon microscope (HyperScope; Scientifica) equipped with a 20x water immersion objective  
863 (XLUMPlanFL; Olympus). Visual stimuli were presented on a panoramic screen covering 270°  
864 azimuth and 69° elevation of the flies' visual field with a DLP projector (Texas Instruments)  
865 (Creamer et al., 2019). Stimuli were pitched 45° forward relative to the screen to account for the  
866 tilt of the fly's head in the shim. The projector output was filtered with a 565/24 in series with a  
867 560/25 filter (Semrock) to prevent green light from bleeding into the PMT. The input into PMT  
868 was also filtered with two 512/25 filters (Semrock) to capture green fluorophore emissions. A  
869 femtosecond Ti-sapphire laser (Mai Tai; Spectra-Physics) provided 930 nm excitation. The power  
870 on the sample was set below 40 mW. Images were acquired at 8.46 Hz with ScanImage (Pologruto  
871 et al., 2003) software and motion-corrected offline. Frames with more than 4.3 microns of motion  
872 were excluded from further analyses, and recordings with more than 5% of frames rejected were  
873 discarded.

874 *Stimulus presentation*

875 The stimuli used in behavioral and imaging experiments are respectively compiled in  
876 **Supplementary Tables 2** and **3**. In some imaging experiments, probe stimuli (**Supplementary**  
877 **Tables 4**) were presented at the beginning of experiments in order to identify responsive ROIs.  
878 See the section on imaging data analysis for how responses to probe stimuli were used in the  
879 analysis. All visual stimuli were presented against mean gray background unless otherwise noted.  
880 Visual objects were all black and presented on the visual equator unless otherwise noted. Each  
881 stimulus presentation was interleaved with blank gray screen, typically around 3 s. When a  
882 stimulus is described in terms of azimuthal and elevational degrees, the azimuthal and elevational  
883 zero respectively correspond to the central meridian and visual equator, with positive degrees  
884 indicating right and ventral visual fields. Since all the imaging experiments were performed on the  
885 right hemisphere, positive horizontal velocity always corresponds to front-to-back movements.  
886 Stimuli used in the single cell imaging experiments (**Figs. 3G-M, 4K-M, S2G-J**) are centered  
887 about the estimated receptive field location of the recorded cell.

888 **Supplementary Table 2. Stimuli used in the behavioral experiments.**

| Stimulus          | Description (duration)                                                                                                                                          | Figures      |
|-------------------|-----------------------------------------------------------------------------------------------------------------------------------------------------------------|--------------|
| Approach stimulus | A cylindrical column with 3 mm diameter and 2 mm height appeared 30 mm to the side and 30 mm ahead or behind the fly, then approached the fly with the velocity | 1FGH, S1BD-G |

|                                             |                                                                                                                                                                                                                                                                                                                                                                                                                                                                                 |                            |
|---------------------------------------------|---------------------------------------------------------------------------------------------------------------------------------------------------------------------------------------------------------------------------------------------------------------------------------------------------------------------------------------------------------------------------------------------------------------------------------------------------------------------------------|----------------------------|
|                                             | of 15 mm/s along the axis parallel to the fly's heading and 7.5 mm/s along the perpendicular axis. (2.67 s)                                                                                                                                                                                                                                                                                                                                                                     |                            |
| Parallel stimulus                           | A 3 mm wide and 2 mm tall rectangular object appeared 15 mm to the side and 15 mm ahead or behind the fly, stayed on the spot for 2 seconds, moved backward or forward parallelly with the fly at 30 mm/s for a second, and then stayed on the spot for another 2 seconds before disappearing. (5 s)                                                                                                                                                                            | 1IJK, 2A-D, 5CD, S1A, S4DE |
| Translating objects on rotating backgrounds | A 10° x 10° black square appeared, stayed in place for a second, moved either back-to-front or front-to-back at 60 °/s for a second, and stayed for another second before disappearing. The midpoints of the trajectories were directly to the side of the fly. The background was either uniform mean gray or 5°-resolution, half-contrast random checkerboards that yaw-rotated around the fly at angular velocities ranging from -60 °/s to 60 °/s, with 20 °/s steps. (3 s) | 1L-O, S1C                  |
| Azimuth sweep                               | A 10° x 10° black square swept 30° horizontal trajectories at 60°/s in either direction. The midpoints of the trajectories were positioned at 15°, 35°, 55°, 75°, 95°, or 115° to the side. (0.5 s)                                                                                                                                                                                                                                                                             | 1PQR, 2EF                  |
| Height sweep                                | A pair of mirror-symmetric objects with 10° width and various heights (5°, 10°, 20°, 40°, 80°) appeared and stayed in place for 2 seconds, moved either back-to-front or front-to-back at 60 °/s, then stayed in place for another 2 seconds before disappearing. The midpoints of the trajectories were directly to the sides of the fly. (5 s)                                                                                                                                | S2C-F                      |
| Rotational sinusoidal waves                 | Full-field, yaw-rotational, quarter-contrast drifting sinusoidal gratings with the spatial period of 60° and temporal frequency of 8 Hz. (0.5 s)                                                                                                                                                                                                                                                                                                                                | S1I                        |
| Translational sinusoidal waves              | Same as the Rotational sinusoidal waves, but symmetrized about the fly such that it moved either back-to-front or front-to-back. (0.5 s)                                                                                                                                                                                                                                                                                                                                        | S1H                        |
| Fast bars                                   | A 10° wide and 106° tall bar appeared on the back of the fly and rotated around the fly at 60 °/s. (6 s)                                                                                                                                                                                                                                                                                                                                                                        | S1J                        |

890 **Supplementary Table 3. Stimuli used in the imaging experiments.**

| Stimulus                                    | Description (duration)                                                                                                                                                                                                                                                                                                | Figures          |
|---------------------------------------------|-----------------------------------------------------------------------------------------------------------------------------------------------------------------------------------------------------------------------------------------------------------------------------------------------------------------------|------------------|
| Translating bars                            | A 10° wide bar extending the full vertical extent of the screen appeared at either -20° or +100° azimuth, and respectively moved at +60 °/s or -60 °/s for 2 seconds. (2 s)                                                                                                                                           | 3BC, 5G, S4H     |
| Translating squares                         | A 10° x 10° square appeared at -20° elevation and either -20° or +100° azimuth, and respectively moved at +60 °/s or -60 °/s for 2 seconds. (2 s)                                                                                                                                                                     | 3BC, 5G, S4H     |
| Expanding discs                             | A disc centered at +20° azimuth and -20° elevation linearly expanded with the initial and terminal radii of 0° and 60°. (2 s)                                                                                                                                                                                         | 3B, 5G, S4H      |
| Drifting square wave gratings               | Full-contrast square wave gratings with the wavelength of 20° moved in the four cardinal directions at 60 °/s. (2 s)                                                                                                                                                                                                  | 3B, 4GH, 5G, S4H |
| Full-field flashes                          | The whole screen turned either uniform white or black. (2 s)                                                                                                                                                                                                                                                          | 3B, 4GH, 5G, S4H |
| RF mapping stimulus                         | A 10° x 10° square moving in one of the four cardinal directions at 60 °/s, sweeping the 40° x 40° square area about the approximate receptive field center with 5° resolution. (0.67 s)                                                                                                                              | 3DEF, S2AB       |
| Height Sweep                                | A rectangular object with 10° width and various heights (5°, 10°, 20°, 40°, 60°, and the full vertical extent of the screen) moved horizontally in either direction at 60 °/s. (1 s)                                                                                                                                  | 3GH, 4KLM        |
| Width Sweep                                 | A rectangular object with 10° height and various widths (5°, 10°, 20°, 30°, 40°, 60°) moved horizontally in either direction at 60 °/s. (1 s)                                                                                                                                                                         | 3IJ              |
| Velocity sweep                              | A 10° x 10° square moved horizontally at various velocities (10 °/s, 20 °/s, 30 °/s, 60 °/s, 120 °/s) in either direction, sweeping a 120° trajectory. (1 to 12 s)                                                                                                                                                    | S2GH             |
| Flicker sweep                               | A 10° x 10° square appeared and flickered on the spot at various temporal frequencies (0.25 Hz, 1 Hz, 2 Hz, 4 Hz, 12 Hz, 20 Hz). (2 s)                                                                                                                                                                                | S2IJ             |
| Translating objects on rotating backgrounds | A 10° x 10° black square appeared and moved horizontally in either direction at 60 °/s for 2 seconds on a background, which was either uniform gray or half-contrast, and consisted of 5° resolution checkerboards that yaw-rotated about the fly at velocities ranging from -60 °/s to +60 °/s with 20°/s steps. The | 3KLM             |

|                               |                                                                                                                                                                                                                                         |           |
|-------------------------------|-----------------------------------------------------------------------------------------------------------------------------------------------------------------------------------------------------------------------------------------|-----------|
|                               | background started a second prior to the onset of the square and lasted a second after the offset of the square. (4 s)                                                                                                                  |           |
| Translating bars              | A 10° wide bar extending the full vertical extent of the screen appeared at either -20° or +70° azimuth, and respectively moved at +60 °/s or -60 °/s for 1.5 seconds. (1.5 s)                                                          | 4GH       |
| Bars in four directions       | A 10° wide vertical or horizontal bars respectively extending the full horizontal or vertical extent of the screen swept the whole screen at 60 °/s in the four cardinal directions. (4.5 s for vertical bars, 2 s for horizontal bars) | 4JOP, S3E |
| Translating squares           | A 10° x 10° square appeared at -30° elevation and either -20° or +100° azimuth, and respectively moved at +60 °/s or -60 °/s for 2 seconds. (2 s)                                                                                       | 3NO       |
| Translating rectangles (RNAi) | A 20° x 10° rectangle appeared at -20° elevation and either -135° or +135° azimuth, and respectively moved at +60 °/s or -60 °/s for 4.5 seconds. (4.5 s)                                                                               | 4N        |

891

892 **Supplementary Table 4. Probe stimuli used in the imaging experiments.**

| Stimulus                      | Description (duration)                                                                                                                                                                                                                  | Figures   |
|-------------------------------|-----------------------------------------------------------------------------------------------------------------------------------------------------------------------------------------------------------------------------------------|-----------|
| Vertical bars                 | A 10° wide bar extending the full vertical extent of the screen appeared at either -20° or +70° azimuth, and respectively moved at +60 °/s or -60 °/s for 1.5 seconds. (1.5 s)                                                          | 4GH       |
| Bars in four directions       | A 10° wide vertical or horizontal bars respectively extending the full horizontal or vertical extent of the screen swept the whole screen at 60 °/s in the four cardinal directions. (4.5 s for vertical bars, 2 s for horizontal bars) | 4JOP, S3E |
| Translating squares           | A 10° x 10° square appeared at -30° elevation and either -20° or +100° azimuth, and respectively moved at +60 °/s or -60 °/s for 2 seconds. (2 s)                                                                                       | 3NO       |
| Translating rectangles (RNAi) | A 20° x 10° rectangle appeared at -20° elevation and either -135° or +135° azimuth, and respectively moved at +60 °/s or -60 °/s for 4.5 seconds. (4.5 s)                                                                               | 4N        |

893

894 *Optogenetic activation during imaging*



895 Optogenetic activation of Chrimson under the two-photon microscope (**Fig. 3C, D**) was performed  
896 using a Thorlabs 690 nm laser diode (Thorlabs, HL6738MG). The measured power of the laser at  
897 the sample was  $\sim 2$  mW/mm<sup>2</sup> and the laser was shone onto the sample through the imaging  
898 objective.

### 899 *Imaging data analysis*

900 ROIs were defined either manually (glomerular and single-cell recordings; **Figs. 3B-M, 4C, D, K-**  
901 **M, S2AB**), with a watershed segmentation algorithm (Meyer, 1994) (dendritic recordings; **Figs.**  
902 **3N, O, 4G-J, N-P, S3C, 5G, S4H**) based on time-averaged fluorescent images, or as 3  $\mu$ m  
903 rectangular grids (pan-neuronal recordings; **Fig. S3D**). To remove stimulus bleed-through, the  
904 recordings were subtracted with the pixel-averaged signals from background regions, which were  
905 defined as the largest contiguous regions below 10 percentile brightness. The fluorescent time  
906 traces were then converted into the unit of  $\Delta F/F$  to account for expression level variability and  
907 photo-bleaching of the fluorophores. To obtain the baseline fluorescence (*i.e.*, the denominator  $F$ ),  
908 fluorescence within each ROI was averaged across pixels, and a decaying exponential  $Ae^{-\tau}$  was fit  
909 to the time-averaged fluorescence within each interleave epoch, where  $\tau$  was constrained to be  
910 identical across all ROIs in a single recording. The fit exponential (*i.e.*, the baseline fluorescence)  
911 was then subtracted from the original ROI-wise fluorescence time traces, and the remainder ( $\Delta F$ )  
912 was then divided by the same fit exponential to generate  $\Delta F/F$  time traces.

913 In some recordings where ROIs were extracted in an automated fashion (**Figs. 3N, O, 4G-J, N-P,**  
914 **S3D, E**), responsive ROIs were selected based on the consistency of their responses to probe  
915 stimuli (see **Supplementary Table 4**). The probe stimuli were typically presented three to five  
916 times before each recording, and Pearson correlations between every pair of responses were  
917 calculated. ROIs with average correlation below certain thresholds were then discarded (0.4 for  
918 GCaMP6f and jGCaMP7b recordings, 0.3 for iGluSnFR recordings).

919 The responses to repetitions of the same stimulus were averaged within each ROI, and then across  
920 all ROIs within each fly to generate an individual mean response. The time-averaged  $\Delta F/F$  during  
921 the 500 ms period preceding each stimulus presentation was subtracted from the time trace to  
922 remove the spontaneous fluctuation of  $\Delta F/F$ . For statistical comparisons across conditions and  
923 genotypes, mean or peak individual mean responses were calculated over appropriate time  
924 windows, which spanned the entire duration of the stimuli unless otherwise noted. Additionally,  
925 group mean responses and standard error of the mean were calculated based on the individual  
926 mean responses across flies to visualize the dynamics of the responses.

927 In some lobula plate recordings (**Figs. 4I, J, S3D, E**), the laminar positions of ROIs were estimated.  
928 To this end, we manually drew a directed line segment that approximately started at the distal end  
929 of lobula plate, traversed the layers orthogonally, and ended at the proximal end. The position of  
930 each ROI along this line segment was calculated as a proxy of its layer affiliation.

### 931 *Receptive field localization*

932 In the single cell recordings (**Figs. 3G-M, S2G-J**), the receptive field (RF) location of each cell  
933 was mapped prior to the experiment, and subsequent stimuli were centered around the estimated  
934 RF location (Tanaka and Clark, 2020). First, the approximate RF location was probed interactively  
935 by presenting translating small black squares. Next, a  $10^\circ$  black square moving horizontally or  
936 vertically at  $60^\circ/\text{s}$  swept the  $40^\circ \times 40^\circ$  area around the approximate RF location at the resolution  
937 of  $5^\circ$  (noted as RF mapping stimulus in **Supplementary Table 3**). For each azimuth and elevation,  
938 the neural response in the unit of  $\Delta F/F$  (see later) was averaged over time within the 1.5 s window  
939 from the stimulus onset and over the directions of motion, resulting in horizontal and vertical  
940 spatial tuning curves. Gaussian functions were independently fit to the two tuning curves, and  
941 resulted means of the distributions were used as the estimated RF center. In addition, the full-width  
942 quarter-width (FWQM) values of the fitted Gaussian functions were later used as the measure of  
943 RF size (**Fig. 3E**). Only sizes of RF with good ( $R^2 > 0.8$ ) Gaussian fit are plotted for this purpose.  
944 In some non-single cell dendritic recordings (**Figs. 3N, O, 4N-P**), azimuthal RF location of each  
945 ROI was estimated based on the averaged time-to-peak in response to objects moving rightward  
946 and leftward.

947

#### 948 *Geometrical simulation*

949 For the simulation in **Figure 1C**, 5 million circular objects with 2 mm radius were simulated  
950 around an observer. The positions of the objects were uniformly distributed within a circular area  
951 with the radius of 200 mm about the observer. We assumed the observer to be moving forward at  
952 10 mm/s, and the speed of the objects were randomly drawn from a uniform distribution ranging  
953 from 0 to 20 mm/s. The direction of the objects' velocity was also chosen uniformly at random.  
954 For each object, given the instantaneous relative position and velocity and under the assumption  
955 that the both observer and the object maintain the constant velocity, we calculated immediate  
956 collision risk as time-discounted, rectified inverse intercept between the observer and the object  
957 trajectories. The intercept  $I$  and immediate collision risk  $h$  are given as follows:

$$958 \quad I = \frac{\dot{x}y - x\dot{y}}{\dot{x}}$$
$$959 \quad h = \begin{cases} e^{-\frac{T}{\tau}} & \text{if } T > 0 \text{ and } I > 0 \\ I + \epsilon & \\ 0 & \text{otherwise} \end{cases}$$

960 where  $(x, y)$  and  $(\dot{x}, \dot{y})$  are the initial position and velocity of the object relative to the observer,  
961  $T = -x/\dot{x}$  (time to path crossing),  $\tau = 10$  s and  $\epsilon = 2$  mm. We then plotted  $h$  as a function of the  
962 instantaneous angular position and velocity of the object as seen by the observer, averaged over  
963 samples. The code to run the simulation is available on GitHub  
964 (<https://github.com/ClarkLabCode/CollisionSimulation>)

965

966 *Proof of the geometrical conjecture*

967 Let us assume a stationary observer at the origin and a circular object with radius  $R$  located at  $\mathbf{r}_0$   
 968  $= [x_0, y_0]$ , moving at a constant velocity  $\mathbf{v} = [v_x, v_y]$ . Let us denote the future position of the  
 969 object as  $\mathbf{r}(t) = [x_0 + v_x t, y_0 + v_y t] = \mathbf{r}_0 + \mathbf{v}t$ , and distance to the object  $d(t) = |\mathbf{r}(t)|$ . Then, the  
 970 future retinal position  $\phi(t)$  and size  $\psi(t)$  of the object seen from the observer can be written as

971 
$$\phi(t) = \text{atan} \frac{x(t)}{y(t)}$$

972 
$$\psi(t) = 2 \text{atan} \frac{R}{d(t)}$$

973 where  $\phi = 0$  points in the positive direction along y-axis. Then, the instantaneous angular velocity  
 974 and expansion rate at time  $t = 0$  can be obtained by differentiating these by  $t$  and evaluating at  $t =$   
 975  $0$ :

976 
$$\dot{\phi} = \frac{v_x y_0 - v_y x_0}{d_0^2}$$

977 
$$\dot{\psi} = -2R \frac{v_x x_0 + v_y y_0}{d_0(R^2 + d_0^2)}$$

978 where  $d_0 = d(0)$ . Now, if we constrain the speed of the object to be a constant  $v = |\mathbf{v}|$ ,  $v_x$  and  $v_y$  can  
 979 be written as  $[v_x, v_y] = v[\cos\theta, \sin\theta]$ , where  $\theta$  is the direction of the object's movement. We can  
 980 also set  $x_0 = 0$  and  $y_0 = d_0$  without losing generality. Then, maximum angular velocity and  
 981 expansion rate of the object are

982

983 
$$\dot{\phi}_{max} = \max_{\theta} \frac{v \cos\theta}{d_0} = \frac{v}{d_0}$$

984 
$$\dot{\psi}_{max} = \max_{\theta} -2R \frac{d_0 v \sin\theta}{d_0(R^2 + d_0^2)} = \frac{2Rv}{R^2 + d_0^2}$$

985 The ratio between these two values can be written as

986 
$$\frac{\dot{\phi}_{max}}{\dot{\psi}_{max}} = \frac{R^2 + d_0^2}{2Rd_0}$$

987 
$$= \frac{1}{2} \left( \frac{1 + \delta^2}{\delta} \right)$$

988 where  $\delta = R/d_0$ . This is a monotonically increasing function of  $\delta$  that grows arbitrarily large  
 989 with  $\delta$ , which is larger than 1 when  $\delta > 1$ . That is, when the object is further than  $R$  away from  
 990 the observer, its apparent angular velocity caused when it moves tangentially to the observer is  
 991 larger than the expansion rate caused when it moves straight toward the observer.

992 *Connectomic identification of T5*

993 To identify candidate T5 cells in the hemibrain v1.1 dataset (Scheffer et al., 2020), we first  
994 extracted cells that had (1) synapses only in lobula or lobula plate, and (2) more presynapses in  
995 lobula plate than in lobula and more postsynapses in lobula than in lobula plate. From this  
996 candidate T5 pool, we identified cells that were connected to only one out of the three sets of  
997 monostratified LPTCs in single lobula plate layers (HS and CH for layer 1, H2 for layer 2, and VS  
998 for layer 4, respectively). After visual inspection, we were able to identify 52 T5a, 36 T5b, and 43  
999 T5d cells. Since there is no identified monostratified LPTC in layer 3 of lobula plate, we searched  
1000 for T5c cells from the candidate T5 pool as ones that had (1) no connection to the aforementioned  
1001 LPTCs, and (2) fewer pre- and postsynapses in lobula and lobula plate than the corresponding  
1002 maximum numbers of pre- and postsynapses in the two neuropils among the T5a, b, d cells  
1003 identified above. After visual inspection, this resulted in 55 T5c cells (**Figs.4A, B, S3A**). We then  
1004 examined the connectivity between the identified T5 subtypes and LPLC1. The code to identify  
1005 candidate T5s can be found on our GitHub repository  
1006 (<https://github.com/ClarkLabCode/LPLC1ConnectomeAnalysis>), and the body IDs of the  
1007 annotated T5s can be found in **Supplementary File 1**.

1008 *Connectomic identification of lobular inputs into LPLC1*

1009 To identify columnar neuron types providing inputs into LPLC1 neurons in the lobula, we first  
1010 extracted all neurons in the hemibrain v1.1 dataset (Scheffer et al., 2020) that have (1) at least 3  
1011 synapses onto a single LPLC1 neuron, (2) no synapse outside of lobula, and (3) less than 300  
1012 synapses in total, pre- and postsynapses combined. This resulted in a pool of 977 distinct lobula  
1013 intrinsic terminals. We then clustered these lobula intrinsic terminals according to their (1)  
1014 connectivity, (2) terminal morphology, and (3) layer innervation patterns. First, we identified all  
1015 labeled cell types that had more than 2 synapses from at least a single cell among the pool of the  
1016 lobula intrinsic terminals, which resulted in 126 distinct identified cell types, including LPLC1.  
1017 We then constructed a 977 x 126 matrix that contained synaptic counts between each lobula  
1018 intrinsic terminal and each postsynaptic cell type. Postsynaptic cells without identified cell types  
1019 were ignored here. Second, we extracted the positions of the all presynapses of each lobula intrinsic  
1020 terminal in the native XYZ coordinate of the hemibrain dataset. Then, these synapse positions  
1021 were translated and rotated such that the new XY axes are approximately parallel to the layers of  
1022 the lobula and the new Z axis is normal to the layers and goes through the retinotopic center of the  
1023 lobula. This new coordinate system was obtained by performing principal component analysis on  
1024 the postsynaptic terminals of the 4 LT1 neurons in the lobula. LT1 neurons have a dense,  
1025 monostratified dendrite in the lobula layer 2 that covers the entire tangential extent of the lobula  
1026 (Fischbach and Dittrich, 1989), which can be used as a landmark. We then calculated three  
1027 standard deviations of the positions of presynapses of each lobula intrinsic terminals along each  
1028 dimension of the new coordinate system, which respectively characterized the spatial spread of the  
1029 terminals in the two tangential dimensions (PC1 and 2) and the normal dimension (PC3). Third, to

1030 identify the layer affiliation of each synaptic terminal, we first fit a surface model to the positions  
1031 of the presynaptic terminals of LT1, which predicted PC3 position of each synapse with a bivariate  
1032 quadratic formula of PC1 and PC2. The least square fit resulted in  $R^2 = 0.74$ . Then, for each  
1033 postsynapse location of the lobula intrinsic terminals, we calculated deviation between its actual  
1034 PC3 position and the prediction from the quadratic model, which was interpreted as the relative  
1035 depth of the synapse with respect to the layer 2 under the assumption that the layer boundaries of  
1036 the lobula can be approximated as parallel quadric manifolds (positive deviations corresponding  
1037 to deeper layers). For each lobula intrinsic terminal, we counted the numbers of the synapses whose  
1038 fell in eleven 5  $\mu\text{m}$  bins ranging from -10  $\mu\text{m}$  to 45  $\mu\text{m}$ . Finally, we ran a hierarchical agglomerative  
1039 clustering on the 977 x 140 connectivity-morphology-innervation matrix and extracted 15 clusters,  
1040 whose membership sizes varied from 18 to 148 cells. We then visualized the all neurons in each  
1041 cluster on neuPrint explorer (Clements et al., 2020) (**Fig. S3C**), and examined their morphology  
1042 while referencing anatomical literature to identify putative cell types (Fischbach and Dittrich,  
1043 1989). The code to run the clustering analysis can be found on our GitHub repository  
1044 (<https://github.com/ClarkLabCode/LPLC1ConnectomeAnalysis>), and the complete list of the cells  
1045 analyzed with their cluster affiliation is provided in **Supplementary File 2**. The list of visually  
1046 annotated T2 and T3 cells can be found in **Supplementary File 3**.

#### 1047 *Connectomic identification and split Gal4 generation for downstream targets of LPLC1*

1048 Major downstream neuron types of LPLC1 were identified in the hemibrain v1.1 dataset (Scheffer  
1049 et al., 2020) through the neuprint website (Clements et al., 2020). Since there were no preexisting  
1050 selective Gal4 drives to label PLP219 and PVL112/113, we created a new split Gal4 lines by  
1051 screening for hemidrivers targeting these cell types using color depth maximum intensity  
1052 projection search (Otsuna et al., 2018) running on multi-color flip out image library (Meissner et  
1053 al., 2020) on the NeuronBridge website (Clements et al., 2020).

#### 1054 *Immunohistochemistry*

1055 The tissues were dissected out in PBS, fixed in 4% paraformaldehyde for 15 minutes, washed three  
1056 times for 20 minutes, blocked with 5% normal goat serum for another 20 minutes, and incubated  
1057 with primary antibodies (mouse anti-Brp, 1:25; chicken anti-GFP, 1:50) in PBST (PBS with 0.2%  
1058 Triton-X) for 24 hours. After another 3 washes, the tissues were incubated with secondary  
1059 antibodies (goat anti-mouse AF633, 1:250; goat anti-Chicken AF488, 1:250). 5% normal goat  
1060 serum was also added to the primary and secondary antibody solutions. The tissues were then  
1061 mounted on glass microscope slides with Vectashield mounting medium, and imaged with a Zeiss  
1062 confocal microscope.

#### 1063 *Quantification and statistical analysis*

1064 For statistical purposes, each fly or cell was counted as an independent measurement, as noted in  
1065 the figure captions.  $p$ -values presented are from Wilcoxon sign-rank tests (within-fly comparisons  
1066 across stimulus conditions), rank-sum tests (across-fly comparisons across populations), Friedman

1067 test (within-fly comparisons across more than 3 stimulus conditions), or 2-way ANOVA (across-  
1068 population comparison of tuning curves where only the existence of the population main effect  
1069 matters). The tests are all as noted in the figure captions.

1070

1071

## 1072 **References**

- 1073 Ache, J.M., Polsky, J., Alghailani, S., Parekh, R., Breads, P., Peek, M.Y., Bock, D.D., von Reyn,  
1074 C.R., and Card, G.M. (2019). Neural Basis for Looming Size and Velocity Encoding in the  
1075 *Drosophila* Giant Fiber Escape Pathway. *Curr. Biol.* *29*, 1073-1081.e4.
- 1076 Antinucci, P., Fogueira, M., and Bianco, I.H. (2019). Pretectal neurons control hunting behaviour.  
1077 *Elife* *8*, 1–34.
- 1078 Barlow, H.B., and Hill, R.M. (1963). Selective sensitivity to direction of movement in ganglion  
1079 cells of the rabbit retina. *Science* (80-. ). *139*, 412–414.
- 1080 Berkeley, G. (1709). An essay towards a new theory of vision (Dublin : printed by Aaron Rhames,  
1081 for Jeremy Pepyat).
- 1082 Bianco, I.H., and Engert, F. (2015). Visuomotor transformations underlying hunting behavior in  
1083 zebrafish. *Curr. Biol.* *25*, 831–846.
- 1084 Bleckert, A., Schwartz, G.W., Turner, M.H., Rieke, F., and Wong, R.O.L. (2014). Visual space is  
1085 represented by nonmatching topographies of distinct mouse retinal ganglion cell types. *Curr. Biol.*  
1086 *24*, 310–315.
- 1087 Borst, A., and Helmstaedter, M. (2015). Common circuit design in fly and mammalian motion  
1088 vision. *Nat. Neurosci.* *18*, 1067–1076.
- 1089 Borst, A., Haag, J., and Mauss, A.S. (2020). How fly neurons compute the direction of visual  
1090 motion. *J. Comp. Physiol. A Neuroethol. Sensory, Neural, Behav. Physiol.* *206*, 109–124.
- 1091 Bradley, D.C., Chang, G.C., and Andersen, R.A. (1998). Encoding of three-dimensional structure-  
1092 from-motion by primate area MT neurons. *Nature* *392*, 714–717.
- 1093 Branco, T., and Redgrave, P. (2020). The Neural Basis of Escape Behavior in Vertebrates. *Annu.*  
1094 *Rev. Neurosci.* *43*, 417–439.
- 1095 Branson, K., Robie, A.A., Bender, J., Perona, P., and Dickinson, M.H. (2009). High-throughput  
1096 ethomics in large groups of *Drosophila*. *Nat. Methods* *6*, 451–457.
- 1097 Card, G.M., and Dickinson, M.H. (2008). Visually Mediated Motor Planning in the Escape  
1098 Response of *Drosophila*. *Curr. Biol.* *18*, 1300–1307.
- 1099 Chalupka, K., Dickinson, M., and Perona, P. (2016). Generalized regressive motion: A visual cue  
1100 to collision. *Bioinspiration and Biomimetics* *11*.
- 1101 Chen, T.-W.W., Wardill, T.J., Sun, Y., Pulver, S.R., Renninger, S.L., Baohan, A., Schreiter, E.R.,  
1102 Kerr, R.A., Orger, M.B., Jayaraman, V., et al. (2013). Ultrasensitive fluorescent proteins for  
1103 imaging neuronal activity. *Nature* *499*, 295–300.
- 1104 Chiu, C., Reddy, P.V., Xian, W., Krishnaprasad, P.S., and Moss, C.F. (2010). Effects of  
1105 competitive prey capture on flight behavior and sonar beam pattern in paired big brown bats,  
1106 *Eptesicus fuscus*. *J. Exp. Biol.* *213*, 3348–3356.
- 1107 Clark, D.A., and Demb, J.B. (2016). Parallel Computations in Insect and Mammalian Visual  
1108 Motion Processing. *Curr. Biol.* *26*, R1062–R1072.
- 1109 Clements, J., Dolafi, T., Umayam, L., Neubarth, N.L., Berg, S., Scheffer, L.K., and Plaza, S.M.  
1110 (2020). neuPrint: Analysis Tools for EM Connectomics. *BioRxiv* 2020.01.16.909465.

- 1111 Creamer, M.S., Mano, O., and Clark, D.A. (2018). Visual Control of Walking Speed in *Drosophila*.  
1112 *Neuron* *100*, 1460-1473.e6.
- 1113 Creamer, M.S., Mano, O., Tanaka, R., and Clark, D.A. (2019). A flexible geometry for panoramic  
1114 visual and optogenetic stimulation during behavior and physiology. *J. Neurosci. Methods* *323*, 48–  
1115 55.
- 1116 Dana, H., Sun, Y., Mohar, B., Hulse, B.K., Kerlin, A.M., Hasseman, J.P., Tsegaye, G., Tsang, A.,  
1117 Wong, A., Patel, R., et al. (2019). High-performance calcium sensors for imaging activity in  
1118 neuronal populations and microcompartments. *Nat. Methods* *16*, 649–657.
- 1119 Davis, F.P., Nern, A., Picard, S., Reiser, M.B., Rubin, G.M., Eddy, S.R., and Henry, G.L. (2020).  
1120 A Genetic, Genomic, and Computational Resource for Exploring Neural Circuit Function. *Elife* *9*,  
1121 e50901.
- 1122 DeAngelis, B.D., Zavatone-Veth, J.A., and Clark, D.A. (2019). The manifold structure of limb  
1123 coordination in walking *Drosophila*. *Elife* *8*, 1–34.
- 1124 Dietzl, G., Chen, D., Schnorrer, F., Su, K.C., Barinova, Y., Fellner, M., Gasser, B., Kinsey, K.,  
1125 Oppel, S., Scheiblauer, S., et al. (2007). A genome-wide transgenic RNAi library for conditional  
1126 gene inactivation in *Drosophila*. *Nature* *448*, 151–156.
- 1127 Eliason, J. (2017). Single Neuron Contributions to Sensory Behaviors in *Drosophila melanogaster*.  
1128 Fischbach, K.F., and Dittrich, A.P.M. (1989). The optic lobe of *Drosophila melanogaster*. I. A  
1129 Golgi analysis of wild-type structure. *Cell Tissue Res.* *258*, 441–475.
- 1130 Förster, D., Helmbrecht, T.O., Mearns, D.S., Jordan, L., Mokayes, N., and Baier, H. (2020).  
1131 Retinotectal circuitry of larval zebrafish is adapted to detection and pursuit of prey. *Elife* *9*, 1–26.
- 1132 De Franceschi, G., Vivattanasarn, T., Saleem, A.B., and Solomon, S.G. (2016). Vision Guides  
1133 Selection of Freeze or Flight Defense Strategies in Mice. *Curr. Biol.* *26*, 2150–2154.
- 1134 Gabbiani, F., Krapp, H.G., and Laurent, G. (1999). Computation of Object Approach by a Wide-  
1135 Field, Motion-Sensitive Neuron. *J. Neurosci.* *19*, 1122–1141.
- 1136 Gabbiani, F., Krapp, H.G., Koch, C., and Laurent, G. (2002). Multiplicative computation in a  
1137 visual neuron sensitive to looming. *J. Neurosci.* *22*, 420.
- 1138 Ghose, K., Horiuchi, T.K., Krishnaprasad, P.S., and Moss, C.F. (2006). Echolocating bats use a  
1139 nearly time-optimal strategy to intercept prey. *PLoS Biol.* *4*, 865–873.
- 1140 Gibson, J.J. (1966). The Senses Considered as Perceptual Systems.
- 1141 Gohl, D.M., Silies, M.A., Gao, X.J., Bhalerao, S., Luongo, F.J., Lin, C.C., Potter, C.J., and  
1142 Clandinin, T.R. (2011). A versatile in vivo system for directed dissection of gene expression  
1143 patterns. *Nat. Methods* *8*, 231–237.
- 1144 Goodale, M. a, and Milner, D. (1992). Separate visual pathways for perception and action. *Trends*  
1145 *Neurosci.* *1*.
- 1146 Guo, C., Pan, Y., and Gong, Z. (2019). Recent Advances in the Genetic Dissection of Neural  
1147 Circuits in *Drosophila*. *Neurosci. Bull.* *35*, 1058–1072.
- 1148 Hampel, S., Franconville, R., Simpson, J.H., and Seeds, A.M. (2015). A neural command circuit  
1149 for grooming movement control. *Elife* *4*, 1–26.



- 1150 Harvey, B.M., and Dumoulin, S.O. (2011). The relationship between cortical magnification factor  
1151 and population receptive field size in human visual cortex: Constancies in cortical architecture. *J.*  
1152 *Neurosci.* *31*, 13604–13612.
- 1153 Hausen, K. (1976). Functional Characterization and Anatomical Identification of Motion Sensitive  
1154 Neurons in the Lobula plate of the Blowfly *Calliphora erythrocephala*. *Zeitschrift Für Naturforsch.*  
1155 *C 31*, 629–634.
- 1156 von Helmholtz, H. (1924). Helmholtz’s treatise on physiological optics, Vol. 1, Trans. from the  
1157 3rd German ed. (Optical Society of America).
- 1158 Heukamp, A.S., Warwick, R.A., and Rivlin-Etzion, M. (2020). Topographic Variations in Retinal  
1159 Encoding of Visual Space. *Annu. Rev. Vis. Sci.* *6*, 237–259.
- 1160 Hong, Y.K., Kim, I.J., and Sanes, J.R. (2011). Stereotyped axonal arbors of retinal ganglion cell  
1161 subsets in the mouse superior colliculus. *J. Comp. Neurol.* *519*, 1691–1711.
- 1162 Hoy, J.L., Bishop, H.I., and Niell, C.M. (2019). Defined Cell Types in Superior Colliculus Make  
1163 Distinct Contributions to Prey Capture Behavior in the Mouse. *Curr. Biol.* *29*, 4130-4138.e5.
- 1164 Isaacman-Beck, J., Paik, K.C., Wienecke, C.F.R., Yang, H.H., Fisher, Y.E., Wang, I.E., Ishida,  
1165 I.G., Maimon, G., Wilson, R.I., and Clandinin, T.R. (2020). SPARC enables genetic manipulation  
1166 of precise proportions of cells. *Nat. Neurosci.* *23*, 1168–1175.
- 1167 Isaacson, M.D. (2018). Using new tools to study the neural mechanisms of sensation : Auditory  
1168 processing in locusts and translational motion vision in flies. 1–114.
- 1169 Jenett, A., Rubin, G.M., Ngo, T.T.B., Shepherd, D., Murphy, C., Dionne, H., Pfeiffer, B.D.,  
1170 Cavallaro, A., Hall, D., Jeter, J., et al. (2012). A GAL4-Driver Line Resource for *Drosophila*  
1171 *Neurobiology*. *Cell Rep.* *2*, 991–1001.
- 1172 Kane, S.A., and Zamani, M. (2014). Falcons pursue prey using visual motion cues: New  
1173 perspectives from animal-borne cameras. *J. Exp. Biol.* *217*, 225–234.
- 1174 Keleş, M.F., and Frye, M.A. (2017). Object-Detecting Neurons in *Drosophila*. *Curr. Biol.* *27*, 1–  
1175 8.
- 1176 Keleş, M.F., Hardcastle, B.J., Städele, C., Qi, X., and Frye, M.A. (2020). Inhibitory interactions  
1177 and columnar inputs to an object motion detector in *Drosophila*. *Cell Rep.* *30*, 2115–2124.
- 1178 Kim, K., Lee, Y.S., Harris, D., Nakahara, K., and Carthew, R.W. (2006). The RNAi pathway  
1179 initiated by *Dicer-2* in *Drosophila*. *Cold Spring Harb. Symp. Quant. Biol.* *71*, 39–44.
- 1180 Kim, T., Shen, N., Hsiang, J., Johnson, K.P., and Kerschensteiner, D. (2020). Dendritic and  
1181 parallel processing of visual threats in the retina control defensive responses. *Sci. Adv.* *6*, eabc9920.
- 1182 Kitamoto, T. (2001). Conditional modification of behavior in *drosophila* by targeted expression of  
1183 a temperature-sensitive *shibire* allele in defined neurons. *Dev. Neurobiol.* *47*, 81–92.
- 1184 Klapoetke, N.C., Murata, Y., Kim, S.S., Pulver, S.R., Birdsey-Benson, A., Cho, Y.K., Morimoto,  
1185 T.K., Chuong, A.S., Carpenter, E.J., Tian, Z., et al. (2014). Independent optical excitation of  
1186 distinct neural populations. *Nat. Methods* *11*, 338–346.
- 1187 Klapoetke, N.C., Nern, A., Peek, M.Y., Rogers, E.M., Breads, P., Rubin, G.M., Reiser, M.B., and  
1188 Card, G.M. (2017). Ultra-selective looming detection from radial motion opponency. *Nature* *551*,  
1189 237–241.

- 1190 Kleiner, M., Brainard, D.H., and Pelli, D. (2007). “Whats new in Psychtoolbox-3?” Percept 36  
1191 ECVF Abstr. Suppl.
- 1192 Konstantinides, N., Kapuralin, K., Fadil, C., Barboza, L., Satija, R., and Desplan, C. (2018).  
1193 Phenotypic Convergence: Distinct Transcription Factors Regulate Common Terminal Features.  
1194 *Cell* 174, 622-635.e13.
- 1195 Land, M.F. (1993). Chasing and pursuit in the dolichopodid fly *Poecilobothrus nobiletatus*. *J.*  
1196 *Comp. Physiol. A* 173, 605–613.
- 1197 Li, Y. tang, Turan, Z., and Meister, M. (2020). Functional Architecture of Motion Direction in the  
1198 Mouse Superior Colliculus. *Curr. Biol.* 30, 3304-3315.e4.
- 1199 Liu, W.W., and Wilson, R.I. (2013). Glutamate is an inhibitory neurotransmitter in the *Drosophila*  
1200 olfactory system. *Proc. Natl. Acad. Sci. U. S. A.* 110, 10294–10299.
- 1201 Maimon, G., Straw, A.D., and Dickinson, M.H. (2008). A Simple Vision-Based Algorithm for  
1202 Decision Making in Flying *Drosophila*. *Curr. Biol.* 18, 464–470.
- 1203 Maisak, M.S., Haag, J., Ammer, G., Serbe, E., Meier, M., Leonhardt, A., Schilling, T., Bahl, A.,  
1204 Rubin, G.M., Nern, A., et al. (2013). A directional tuning map of *Drosophila* elementary motion  
1205 detectors. *Nature* 500, 212–216.
- 1206 Marvin, J.S., Borghuis, B.G., Tian, L., Cichon, J., Harnett, M.T., Akerboom, J., Gordus, A.,  
1207 Renninger, S.L., Chen, T.W., Bargmann, C.I., et al. (2013). An optimized fluorescent probe for  
1208 visualizing glutamate neurotransmission. *Nat. Methods* 10, 162–170.
- 1209 Mauss, A.S., Pankova, K., Arenz, A., Nern, A., Rubin, G.M., and Borst, A. (2015). Neural Circuit  
1210 to Integrate Opposing Motions in the Visual Field. *Cell* 162, 351–362.
- 1211 Meissner, G.W., Dorman, Z., Nern, A., Forster, K., Jeter, J., Johnson, L., He, Y., Lee, K., Melton,  
1212 B., Clements, J., et al. (2020). An image resource of subdivided *Drosophila* GAL4-driver  
1213 expression patterns for neuron-level searches. *BioRxiv*.
- 1214 Meyer, F. (1994). Topographic distance and watershed lines. *Signal Processing* 38, 113–125.
- 1215 Mischiati, M., Lin, H.T., Herold, P., Imler, E., Olberg, R., and Leonardo, A. (2015). Internal  
1216 models direct dragonfly interception steering. *Nature* 517, 333–338.
- 1217 Mishkin, M., Ungerleider, L.G., and Macko, K.A. (1983). Object vision and spatial vision: Two  
1218 cortical pathways. *Trends Neurosci.* 6, 414–417.
- 1219 Molina-Obando, S., Vargas-Fique, J.F., Henning, M., Gür, B., Schlad, T.M., Akhtar, J., Berger,  
1220 T.K., and Silies, M. (2019). On selectivity in the *drosophila* visual system is a multisynaptic  
1221 process involving both glutamatergic and GABAergic inhibition. *Elife* 8, 1–34.
- 1222 Morimoto, M.M., Nern, A., Zhao, A., Rogers, E.M., Wong, A.M., Isaacson, M.D., Bock, D.D.,  
1223 Rubin, G.M., and Reiser, M.B. (2020). Spatial readout of visual looming in the central brain of  
1224 *Drosophila*. *Elife* 9, e57685.
- 1225 Mu, L., Ito, K., Bacon, J.P., and Strausfeld, N.J. (2012). Optic Glomeruli and Their Inputs in  
1226 *Drosophila* Share an Organizational Ground Pattern with the Antennal Lobes. *J. Neurosci.* 32,  
1227 6061–6071.
- 1228 Murtaugh, S.A., and Criel, H.E. (1966). Fundamentals of proportional navigation. *IEEE Spectr.* 3,  
1229 75–85.

- 1230 Namiki, S., Dickinson, M.H., Wong, A.M., Korff, W., and Card, G.M. (2018). The functional  
1231 organization of descending sensory-motor pathways in *Drosophila*. *Elife* 7, e34272.
- 1232 Ölveczky, B.P., Baccus, S.A., and Meister, M. (2003). Segregation of object and background  
1233 motion in the retina. *Nature* 423, 401–408.
- 1234 Otsuna, H., and Ito, K. (2006). Systematic analysis of the visual projection neurons of *Drosophila*  
1235 *melanogaster*. I. Lobula-specific pathways. *J. Comp. Neurol.* 497, 928–958.
- 1236 Otsuna, H., Ito, M., and Kawase, T. (2018). Color depth MIP mask search: a new tool to expedite  
1237 Split-GAL4 creation. *BioRxiv* 4, 318006.
- 1238 Özel, M.N., Simon, F., Jafari, S., Holguera, I., Chen, Y.C., Benhra, N., El-Danaf, R.N., Kapuralin,  
1239 K., Malin, J.A., Konstantinides, N., et al. (2020). Neuronal diversity and convergence in a visual  
1240 system developmental atlas. *Nature*.
- 1241 Panser, K., Tirian, L., Schulze, F., Villalba, S., Jefferis, G.S.X.E., Bühler, K., and Straw, A.D.  
1242 (2016). Automatic Segmentation of *Drosophila* Neural Compartments Using GAL4 Expression  
1243 Data Reveals Novel Visual Pathways. *Curr. Biol.* 26, 1943–1954.
- 1244 Peek, M.Y., and Card, G.M. (2016). Comparative approaches to escape. *Curr. Opin. Neurobiol.*  
1245 41, 167–173.
- 1246 Pologruto, T.A., Sabatini, B.L., and Svoboda, K. (2003). ScanImage: Flexible software for  
1247 operating laser scanning microscopes. *Biomed. Eng. Online* 2, 1–9.
- 1248 von Reyn, C.R., Breads, P., Peek, M.Y., Zheng, G.Z., Williamson, W.R., Yee, A.L., Leonardo, A.,  
1249 and Card, G.M. (2014). A spike-timing mechanism for action selection. *Nat. Neurosci.* 17, 962–  
1250 970.
- 1251 von Reyn, C.R., Nern, A., Williamson, W.R., Breads, P., Wu, M., Namiki, S., and Card, G.M.  
1252 (2017). Feature Integration Drives Probabilistic Behavior in the *Drosophila* Escape Response.  
1253 *Neuron* 94, 1190-1204.e6.
- 1254 Ribeiro, I.M.A., Drews, M., Bahl, A., Machacek, C., Borst, A., and Dickson, B.J. (2018). Visual  
1255 Projection Neurons Mediating Directed Courtship in *Drosophila*. *Cell* 174, 607-621.e18.
- 1256 Robles, E., Laurell, E., and Baier, H. (2014). The retinal projectome reveals brain-area-specific  
1257 visual representations generated by ganglion cell diversity. *Curr. Biol.* 24, 2085–2096.
- 1258 Salazar-Gatzimas, E., Chen, J., Creamer, M.S., Mano, O., Mandel, H.B., Matulis, C.A., Pottackal,  
1259 J., and Clark, D.A. (2016). Direct Measurement of Correlation Responses in *Drosophila*  
1260 Elementary Motion Detectors Reveals Fast Timescale Tuning. *Neuron* 92, 227–239.
- 1261 Sanes, J.R., and Zipursky, S.L. (2010). Design Principles of Insect and Vertebrate Visual Systems.  
1262 *Neuron* 66, 15–36.
- 1263 Sasaki, Y., Rajimehr, R., Kim, B.W., Ekstrom, L.B., Vanduffel, W., and Tootell, R.B.H. (2006).  
1264 The Radial Bias: A Different Slant on Visual Orientation Sensitivity in Human and Nonhuman  
1265 Primates. *Neuron* 51, 661–670.
- 1266 Scheffer, L.K., Xu, C.S., Januszewski, M., Lu, Z., Takemura, S.Y., Hayworth, K.J., Huang, G.B.,  
1267 Shinomiya, K., Maitin-Shepard, J., Berg, S., et al. (2020). A connectome and analysis of the adult  
1268 *drosophila* central brain. *Elife* 9, 1–74.
- 1269 Schiff, W., Caviness, J.A., and Gibson, J.J. (1962). Persistent Fear Responses in Rhesus Monkeys

- 1270 to the Optical Stimulus of “Looming.” *Science* (80-. ). 136.
- 1271 Schilling, T., and Borst, A. (2015). Local motion detectors are required for the computation of  
1272 expansion Flow-Fields. *Biol. Open* 4, 1105–1108.
- 1273 Semmelhack, J.L., Donovan, J.C., Thiele, T.R., Kuehn, E., Laurell, E., and Baier, H. (2014). A  
1274 dedicated visual pathway for prey detection in larval zebrafish. *Elife* 3, 1–19.
- 1275 Städele, C., Keleş, M.F., Mongeau, J.-M.M., and Frye, M.A. (2020). Non-canonical Receptive  
1276 Field Properties and Neuromodulation of Feature-Detecting Neurons in Flies. *Curr. Biol.* 30, 1–  
1277 12.
- 1278 Sun, H., and Frost, B.J. (1998). Computation of different optical variables of looming objects in  
1279 pigeon nucleus rotundus neurons. *Nat. Neurosci.* 1, 296–303.
- 1280 Tanaka, R., and Clark, D.A. (2020). Object-Displacement-Sensitive Visual Neurons Drive  
1281 Freezing in *Drosophila*. *Curr. Biol.* 30, 1–19.
- 1282 Temizer, I., Donovan, J.C., Baier, H., and Semmelhack, J.L. (2015). A Visual Pathway for  
1283 Looming-Evoked Escape in Larval Zebrafish. *Curr. Biol.* 25, 1823–1834.
- 1284 de Vries, S.E.J., and Clandinin, T. (2013). Optogenetic stimulation of escape behavior in  
1285 *Drosophila melanogaster*. *J. Vis. Exp.* 1–6.
- 1286 Wilson, R.I., Turner, G.C., and Laurent, G. (2004). Transformation of Olfactory Representations  
1287 in the *Drosophila* Antennal Lobe. *Science* (80-. ). 303, 366–370.
- 1288 Wu, M., Nern, A., Williamson, W.R., Morimoto, M.M., Reiser, M.B., Card, G.M., and Rubin,  
1289 G.M. (2016). Visual projection neurons in the *Drosophila* lobula link feature detection to distinct  
1290 behavioral programs. *Elife* 5, e21022.
- 1291 Yang, H.H., and Clandinin, T.R. (2018). Elementary Motion Detection in *Drosophila* : Algorithms  
1292 and Mechanisms. *Annu. Rev. Vis. Sci.* 4, 143–163.
- 1293 Yilmaz, M., and Meister, M. (2013). Rapid innate defensive responses of mice to looming visual  
1294 stimuli. *Curr. Biol.* 23, 2011–2015.
- 1295 Zabala, F., Polidoro, P., Robie, A.A., Branson, K., Perona, P., and Dickinson, M.H. (2012). A  
1296 simple strategy for detecting moving objects during locomotion revealed by animal-robot  
1297 interactions. *Curr. Biol.* 22, 1344–1350.
- 1298 Zhang, Y., Kim, I.-J., Sanes, J.R., and Meister, M. (2012). The most numerous ganglion cell type  
1299 of the mouse retina is a selective feature detector. *Proc. Natl. Acad. Sci. U. S. A.* 109, E2391-8.
- 1300
